# Supplementary material
Source: Royal Society of Chemistry journal article supplement (doi:10.1039/d6cc01746k)
Supplement: d6cc01746k1.pdf [file d6cc01746k1.pdf]

Supplementary Information

**Substituent-induced modulation of proaromaticity in benzo-fused fluorenophenylene exhibiting low-lying LUMO**

Sakshi Sahewal,<sup>a</sup> Suman Sharma,<sup>a</sup> Dibyendu Mallick<sup>b</sup> and Soumyajit Das\*<sup>a</sup>

<sup>a</sup>*Department of Chemistry, Indian Institute of Technology Ropar, Rupnagar 140001, Punjab, India.*

<sup>b</sup>*Department of Chemistry, Presidency University, Kolkata 700073, West Bengal, India.*

Email: [chmsdas@iitrpr.ac.in](mailto:chmsdas@iitrpr.ac.in)

**Table of Contents**

|                                              |     |
|----------------------------------------------|-----|
| 1. Experimental section.....                 | S2  |
| 1.1 General Information.....                 | S2  |
| 1.2 Syntheses and characterization data..... | S2  |
| 1.3 NMR spectra.....                         | S7  |
| 2. X-ray crystallographic analysis.....      | S15 |
| 3. DFT calculations.....                     | S17 |
| 3.1 NPA analyses.....                        | S19 |
| 3.2 TDDFT calculations in gas-phase.....     | S26 |
| 4. Appendix.....                             | S46 |
| 5. References.....                           | S51 |

## 1. Experimental section

**1.1 General information:** Chemicals and reagents were purchased from local and international commercial suppliers (Merck, GLR innovations, BLD pharm, Spectrochem) and used without further purification. Compound **4** was synthesized according to a known method.<sup>1</sup> Thin layer chromatography (TLC) was performed using pre-coated silica plates purchased from Merck (silica gel 60 PF254, 0.25 mm). Column chromatography was performed using silica gel 100-200 mesh. NMR spectra were recorded in CDCl<sub>3</sub> (Eurisotop) at room temperature on a JEOL JNM-ECS400 spectrometer, operating at frequencies of 400 MHz (<sup>1</sup>H) or 100 MHz (<sup>13</sup>C), as indicated in the individual spectra. Chemical shifts ( $\delta$ ) are given in ppm relative to residual solvent (chloroform  $\delta = 7.26$  for <sup>1</sup>H, and  $\delta = 77.16$  for proton-decoupled <sup>13</sup>C NMR), and coupling constants ( $J$ ) are expressed in Hertz (Hz). Multiplicity is tabulated as s (singlet), d (doublet), dd (doublet of doublet), t (triplet), q (quartet), and m (multiplet). High-resolution mass spectra (HRMS) were recorded using electrospray ionization (ESI) methods on a Waters (XEVO G2-XS QTOF) mass spectrometer. UV-vis-NIR spectra were recorded in the JASCO V-770 spectrophotometer. Cyclic voltammetry was performed using an Electrochemical Analyzer potentiostat model CHI-1115C from CH Instruments with a conventional three-electrode cell at room temperature under a nitrogen atmosphere at a scan rate of 50 mV s<sup>-1</sup>. This electrochemical cell contains a glassy carbon (disc-shaped with 3-mm diameter) as a working electrode, a Pt wire as a counter electrode, and an Ag wire as a pseudo-reference electrode. The glassy carbon working electrode was polished with 1.0-micron  $\alpha$ -alumina polishing powder using a figure-eight motion. Electrolyte solution (0.1 M) was prepared from dichloromethane (DCM) and tetra-*n*-butylammonium hexafluorophosphate (*n*Bu<sub>4</sub>NPF<sub>6</sub>). The DCM was degassed by nitrogen gas sparging for 10 minutes before measurements. The potential was externally calibrated against the ferrocene/ferrocenium couple. Melting points were determined using a Cole-Parmer MP 250D-P melting point analyzer.

### 1.2 Syntheses and characterization data

**Compound 5:** An oven-dried glass tube was charged with **4** (282 mg, 936.31  $\mu$ mol), bis(pinacolatodiboron) (285 mg, 1.12 mmol), KOAc (460 mg, 4.68 mmol), and dry 1,4-dioxane (8 mL). The suspension was purged with N<sub>2</sub> for 30 mins before adding PdCl<sub>2</sub>(dppf)·DCM (38 mg, 5 mol%), and the glass tube was sealed. The reaction mixture was stirred at 85 °C for 12 h. After being cooled to room temperature, volatile organics were removed under reduced pressure, and water was added. The mixture was extracted with EtOAc (5 x 60 mL), dried over anhydrous Na<sub>2</sub>SO<sub>4</sub>, and filtered. The organic layer was removed under reduced pressure, and the crude obtained was quickly column chromatographed on a short silica gel pad (hexanes:

EtOAc, 90:10) to afford the compound **5** as a white solid (214 mg, 65% yield).  $R_f = 0.36$  (hexanes:EtOAc = 9:1). mp: 124 °C.  $^1\text{H}$  NMR (400 MHz,  $\text{CDCl}_3$ ):  $\delta$  8.67 (d,  $J = 9.0$  Hz, 1H), 8.57 (d,  $J = 8.3$  Hz, 1H), 7.83 (dd,  $J = 7.8, 1.2$  Hz, 1H), 7.76 (d,  $J = 9.0$  Hz, 1H), 7.68 (d,  $J = 9.1$  Hz, 1H), 7.60 (ddd,  $J = 8.4, 7.1, 1.4$  Hz, 1H), 7.53 – 7.48 (m, 1H), 7.27-7.25 (d, 1H), 4.18 (q,  $J = 7.0$  Hz, 2H), 1.50 (s, 12H), 1.47 (t,  $J = 6.9$  Hz, 3H).  $^{13}\text{C}\{^1\text{H}\}$  NMR (100 MHz,  $\text{CDCl}_3$ ):  $\delta$  161.4, 136.2, 130.8, 128.5, 127.6, 126.4, 125.9, 125.5, 124.5, 122.2, 112.2, 84.1, 64.4, 25.0, 15.1. HRMS (ESI)  $m/z$ :  $[\text{M} + \text{H}]^+$  Calcd for  $\text{C}_{22}\text{H}_{26}\text{BO}_3$  349.1975, found 349.1959 (error: -1.6 ppm).

**Compound 7:** An oven-dried thick-walled glass tube was charged with 5-bromo-2-iodobenzaldehyde **6** (200 mg, 643.26  $\mu\text{mol}$ ), 2-(2-ethoxyphenanthren-1-yl)-4,4,5,5-tetramethyl-1,3,2-dioxaborolane **5** (142 mg, 643.26  $\mu\text{mol}$ ), anhydrous  $\text{K}_3\text{PO}_4$  (682 mg, 3.22 mmol), toluene (5 mL), water (0.5 mL), and the mixture was purged with nitrogen for 40 mins. Catalyst  $\text{PdCl}_2(\text{dppf})\cdot\text{DCM}$  (26 mg, 5 mol%) was subsequently added under nitrogen, and the glass vial was sealed before being warmed to 110 °C using an oil bath. After 12 h, the flask was cooled to room temperature, and the solvent was evaporated under reduced pressure. Water was added, and the mixture was extracted with EtOAc (3 x 30 mL). The organic layer was dried over sodium sulfate and then evaporated to dryness. The residue was purified by silica gel column chromatography (hexanes:EtOAc, 95:5) to afford the product **7** as a light yellow solid (115 mg, 44% yield).  $R_f = 0.44$  (hexanes:EtOAc = 9:1). mp: 155 °C.  $^1\text{H}$  NMR (400 MHz,  $\text{CDCl}_3$ )  $\delta$  9.57 (s, 1H), 8.79 (d,  $J = 9.2$  Hz, 1H), 8.66 (d,  $J = 8.3$  Hz, 1H), 8.25 (d,  $J = 2.2$  Hz, 1H), 7.84 (dd,  $J = 8.1, 2.0$  Hz, 2H), 7.71 – 7.65 (m, 1H), 7.63 (d,  $J = 9.2$  Hz, 1H), 7.60 – 7.55 (m, 1H), 7.41 (d,  $J = 9.2$  Hz, 1H), 7.28 (d,  $J = 1.4$  Hz, 1H), 7.26 (s, 1H), 4.14 (q,  $J = 7.0$  Hz, 2H), 1.25 (t,  $J = 6.9$  Hz, 3H).  $^{13}\text{C}\{^1\text{H}\}$  NMR (100 MHz,  $\text{CDCl}_3$ ):  $\delta$  191.3, 154.4, 139.4, 136.6, 136.5, 134.4, 132.2, 130.6, 130.3, 130.0, 128.7, 128.5, 127.2, 126.2, 125.0, 124.9, 123.5, 122.4, 122.3, 120.6, 112.4, 64.5, 14.8. HRMS (ESI)  $m/z$ :  $[\text{M} + \text{H}]^+$  Calcd for  $\text{C}_{23}\text{H}_{18}\text{BrO}_2$  405.0490, found 405.0507 (error: 4.2 ppm).

**Compound 9:** 2-Mesitylmagnesium bromide (1 M solution in THF, 3.21 mL, 3.21 mmol) was added dropwise to the 10 mL dry THF solution of compound **7** (650 mg, 1.60 mmol) under nitrogen, and the mixture was stirred at room temperature for 12 h. The reaction mixture was quenched with a saturated solution of ammonium chloride (50 mL), and the volatile organics were evaporated in vacuo. The residue was extracted with DCM (3 x 50 mL), washed with water, and dried over sodium sulfate. The organic layer was filtered, and the filtrate was removed under reduced pressure to afford crude **8**. To the solution of crude **8** in anhydrous

DCM (10 mL) at room temperature,  $\text{BF}_3 \cdot \text{Et}_2\text{O}$  (0.1 mL) was added dropwise under nitrogen, and the reaction mixture was stirred for 15 min at room temperature to perform an intramolecular ring-closure reaction. After 15 min, a saturated aqueous  $\text{NH}_4\text{Cl}$  solution was added to the reaction mixture and extracted with DCM (3 x 50 mL). The organic layer was dried over anhydrous  $\text{Na}_2\text{SO}_4$ , filtered, and removed under reduced pressure to afford a residue which was purified by silica gel column chromatography (hexanes) to give **9** as a yellow solid (300 mg, 37% yield over two steps).  $R_f = 0.48$  (hexanes). mp: 140 °C.  $^1\text{H}$  NMR (400 MHz,  $\text{CDCl}_3$ )  $\delta$  8.79 (d,  $J = 8.8$  Hz, 1H), 8.64 (d,  $J = 9.2$  Hz, 1H), 8.55 (d,  $J = 8.3$  Hz, 1H), 7.59 (d,  $J = 7.9$  Hz, 1H), 7.56–7.52 (m, 1H), 7.49 (d,  $J = 9.2$  Hz, 1H), 7.46–7.42 (m, 1H), 7.39 (ddd,  $J = 8.7, 2.3, 0.9$  Hz, 1H), 7.06 (s, 1H), 7.04 (d,  $J = 2.5$  Hz, 1H), 6.95 (dd,  $J = 2.2, 1.5$  Hz, 1H), 6.92 (s, 1H), 5.99 (s, 1H), 4.41 (dq,  $J = 9.1, 7.0$  Hz, 1H), 4.29 (dq,  $J = 9.2, 7.0$  Hz, 1H), 2.41 (d,  $J = 6.4$  Hz, 6H), 1.63 (s, 3H), 1.59 (t,  $J = 7.0$  Hz, 3H).  $^{13}\text{C}\{^1\text{H}\}$  NMR (100 MHz,  $\text{CDCl}_3$ ):  $\delta$  155.2, 141.1, 137.9, 136.7, 134.1, 131.7, 131.1, 130.6, 130.3, 129.6, 129.3–128.8, 128.7, 128.1, 126.0, 125.0, 124.1, 123.7, 122.1, 121.5, 118.1, 115.2, 65.4, 44.2, 21.9, 21.0, 15.3. HRMS (ESI)  $m/z$ :  $[\text{M}]^+$  Calcd for  $\text{C}_{32}\text{H}_{27}\text{BrO}$  506.1245, found 506.1230 (error: -2.96 ppm).

**Compound 11:** An oven-dried thick-walled glass tube was charged with 6-bromo-3-ethoxy-8-mesityl-8H-benzo[*fg*]tetracene **9** (300 mg, 591.17  $\mu\text{mol}$ ), (2-formylphenyl)boronic acid **10** (133 mg, 886.75  $\mu\text{mol}$ ), anhydrous  $\text{K}_2\text{CO}_3$  (408 mg, 2.96 mmol), toluene (10 mL), water (1 mL), ethanol (1 mL) and the mixture was purged with nitrogen for 40 mins. Catalyst  $\text{Pd}_2\text{dba}_3$  (27 mg, 5 mol%), SPhos (48 mg, 20 mol%) was subsequently added under nitrogen, and the glass vial was sealed before being warmed to 110 °C using an oil bath. After 12 h, the flask was cooled to room temperature, and the solvent was evaporated under reduced pressure. Water was added, and the mixture was extracted with EtOAc (3 x 30 mL). The organic layer was dried over sodium sulfate and then evaporated to dryness. The residue was purified by washing with methanol to afford the product **11** as a light green solid (200 mg, 63% yield).  $R_f = 0.44$  (hexanes:DCM = 8:2). mp: 220 °C.  $^1\text{H}$  NMR (400 MHz,  $\text{CDCl}_3$ )  $\delta$  9.91 (s, 1H), 9.02 (d,  $J = 8.4$  Hz, 1H), 8.67 (d,  $J = 9.2$  Hz, 1H), 8.57 (d,  $J = 8.3$  Hz, 1H), 7.99–7.93 (m, 1H), 7.61 (d,  $J = 7.8$  Hz, 1H), 7.59–7.52 (m, 3H), 7.46 (d,  $J = 7.1$  Hz, 1H), 7.43 (d,  $J = 7.3$  Hz, 1H), 7.36 (d,  $J = 7.9$  Hz, 1H), 7.30 (d,  $J = 8.5$  Hz, 1H), 7.09 (d,  $J = 2.4$  Hz, 1H), 7.01 (s, 1H), 6.94 (s, 1H), 6.85 (s, 1H), 6.09 (s, 1H), 4.46 (dq,  $J = 14.0, 7.0$  Hz, 1H), 4.34 (dq,  $J = 14.0, 7.0$  Hz, 1H), 2.40 (s, 3H), 2.36 (s, 3H), 1.68 (s, 3H), 1.64 (t,  $J = 7.0$  Hz, 3H);  $^{13}\text{C}\{^1\text{H}\}$  NMR (100 MHz,  $\text{CDCl}_3$ ):  $\delta$  192.3, 155.5, 145.9, 139.1, 137.8, 137.2, 136.5, 136.3, 134.4, 133.8, 133.5, 131.6, 131.2, 130.7, 129.8, 129.1, 128.7, 128.6, 128.2, 128.1, 127.9, 127.6, 127.5, 126.0, 125.9, 125.0, 124.2,

123.8, 122.1, 118.2, 115.0, 65.4, 44.3, 22.0, 21.0, 15.3. HRMS (ESI)  $m/z$ :  $[M+H]^+$  Calcd for  $C_{39}H_{33}O_2$  533.2481, found 533.2459 (error: -4.1 ppm).

**Compound 1:** 2-Mesitylmagnesium bromide (1 M solution in THF, 0.4 mL, 375.46  $\mu$ mol) was added dropwise to the 10 mL dry THF solution of compound **11** (100 mg, 187.73  $\mu$ mol) under nitrogen, and the mixture was stirred at room temperature for 12 h. The reaction mixture was quenched with a saturated solution of ammonium chloride (50 mL), and the volatile organics were evaporated in vacuo. The residue was extracted with DCM (3 x 50 mL), washed with water, and dried over sodium sulfate. The organic layer was filtered, and the filtrate was removed under reduced pressure to afford the precursor alcohol as a yellow solid. To the solution of crude alcohol in anhydrous DCM (10 mL) at room temperature,  $BF_3 \cdot Et_2O$  (0.1 mL) was added dropwise under nitrogen, and the reaction mixture was stirred for 15 min at room temperature to perform an intramolecular ring-closure reaction. After 15 min, a saturated aqueous  $NH_4Cl$  solution was added to the reaction mixture and it was extracted with DCM (3 x 50 mL). The organic layer was dried over anhydrous  $Na_2SO_4$ , filtered, and removed under reduced pressure to afford a residue which was purified by silica gel column chromatography (hexanes) to give dihydro derivative **12** (50 mg, crude). DDQ (48 mg, 75.61  $\mu$ mol) was added to the solution of **12** (17 mg, 75.61  $\mu$ mol) in dry toluene (5 mL) under nitrogen, and the reaction mixture was stirred at 110 °C for 5 h. Once the starting material was consumed (as monitored by TLC), the toluene was removed in vacuo, and the crude was purified by silica gel column chromatography (hexanes:DCM, 95:5) to afford target compound **1** as a dark-green solid (30 mg, 62% yield):  $R_f = 0.3$  (10% DCM/hexanes). mp: 321 °C.  $^1H$  NMR (400 MHz,  $CDCl_3$ )  $\delta$  8.82 (s, 1H), 8.58 (d,  $J = 9.2$  Hz, 1H), 8.50 (d,  $J = 8.4$  Hz, 1H), 7.63 – 7.60 (m, 2H), 7.53 (t,  $J = 7.5$  Hz, 1H), 7.42 – 7.40 (m, 2H), 7.28 (s, 1H), 7.22 (s, 1H), 7.18 (t,  $J = 7.4$  Hz, 1H), 7.13 – 7.09 (m, 3H), 7.01 – 6.98 (m, 3H), 4.22 (q,  $J = 6.9$  Hz, 2H), 2.51 (s, 3H), 2.38 (s, 3H), 2.16 (s, 6H), 2.04 (s, 6H), 1.16 (t,  $J = 6.9$  Hz, 3H).  $^{13}C\{^1H\}$  NMR (100 MHz,  $CDCl_3$ ):  $\delta$  157.2, 144.4, 141.7, 138.3, 137.6, 137.4, 137.3, 136.8, 136.5, 134.9, 134.6, 134.4, 131.6, 131.4, 130.9, 130.4, 129.3, 128.4, 128.0, 127.9, 127.4, 127.3, 126.2, 126.1, 124.4, 124.3, 122.9, 122.8, 122.2, 121.8, 120.7, 120.5, 118.9, 113.0, 64.9, 21.4, 21.2, 20.5, 20.1, 14.1. HRMS (ESI)  $m/z$ :  $[M]^+$  Calcd for  $C_{48}H_{40}O$  632.3079, found 632.3084 (error: 0.72 ppm).

**Compound 2:** (2,4,6-Trifluorophenyl)magnesium bromide (1 M solution in THF, 0.56 mL, 563.19  $\mu$ mol) was added dropwise to the 10 mL dry THF solution of compound **11** (150 mg, 281.59  $\mu$ mol) under nitrogen, and the mixture was stirred at room temperature for 12 h. The reaction mixture was quenched with a saturated solution of ammonium chloride (50 mL), and the volatile organics were evaporated in vacuo. The residue was extracted with DCM (3 x 50

mL), washed with water, and dried over sodium sulfate. The organic layer was filtered, and the filtrate was removed under reduced pressure to afford the alcohol intermediate. To the solution of crude alcohol in anhydrous DCM (10 mL) at room temperature,  $\text{BF}_3 \cdot \text{Et}_2\text{O}$  (0.1 mL) was added dropwise under nitrogen, and the reaction mixture was stirred for 15 min at room temperature to perform an intramolecular ring-closure reaction. After 10 min, a saturated aqueous  $\text{NH}_4\text{Cl}$  solution was added to the reaction mixture and it was extracted with DCM (3 x 50 mL). The organic layer was dried over anhydrous  $\text{Na}_2\text{SO}_4$ , filtered, and removed under reduced pressure to afford a residue which was purified by silica gel column chromatography (hexanes) to give as dihydro precursor **13** as a white-green solid (118 mg). *p*-Chloranil (84 mg, 340.16  $\mu\text{mol}$ ) was added to the solution of **13** (55 mg, 85.04  $\mu\text{mol}$ ) in dry toluene (5 mL) under nitrogen, and the reaction mixture was stirred at 110 °C for 6 h. Once the starting material was consumed (as monitored by TLC), the toluene was removed in vacuo, and the crude was purified by silica gel column chromatography (hexanes:DCM, 95:5) to afford target compound **2** as a dark-green solid (30 mg, 85% yield):  $R_f = 0.4$  (10% DCM/hexanes). mp: 330 °C.  $^1\text{H}$  NMR (400 MHz,  $\text{CDCl}_3$ )  $\delta$  9.08 (s, 1H), 8.65 (d,  $J = 9.2$  Hz, 1H), 8.54 (d,  $J = 8.2$  Hz, 1H), 7.64 (dd,  $J = 7.5, 3.8$  Hz, 2H), 7.59 – 7.55 (m, 1H), 7.50 (d,  $J = 9.2$  Hz, 1H), 7.44 (t,  $J = 7.2$  Hz, 1H), 7.39 (s, 1H), 7.35 (s, 1H), 7.28 – 7.24 (m, 1H), 7.15 (d,  $J = 7.3$  Hz, 2H), 7.11 (s, 2H), 6.90 – 6.86 (m, 2H), 4.36 (q,  $J = 6.9$  Hz, 2H), 2.51 (s, 3H), 2.01 (s, 6H), 1.45 (t,  $J = 7.0$  Hz, 3H).  $^{13}\text{C}\{^1\text{H}\}$  NMR (100 MHz,  $\text{CDCl}_3$ )  $\delta$  169.6, 157.6, 144.0, 143.2, 140.8, 138.1, 137.5, 137.4, 134.3, 134.1, 131.29, 130.0, 129.5, 128.5, 128.4, 127.9, 127.7, 126.2, 124.5, 123.4, 122.8, 122.3, 121.0, 120.8, 120.3, 118.7, 113.3, 100.7, 65.0, 21.4, 20.1, 14.8.  $^{19}\text{F}$  NMR (376 MHz,  $\text{CDCl}_3$ )  $\delta$  -104.2, -108.9. HRMS (ESI)  $m/z$ :  $[\text{M}]^+$  Calcd for  $\text{C}_{45}\text{H}_{31}\text{F}_3\text{O}$  644.2327, found 644.2314 (error: -0.51 ppm).

**Compound 3:** To a 10 mL dry THF solution of **11** (200 mg, 375.46  $\mu\text{mol}$ ) under a nitrogen atmosphere, dropwise addition of pentafluorophenylmagnesium bromide (0.5 M in THF, 0.7 mL, 750.92  $\mu\text{mol}$ ) was done, and the mixture was stirred at room temperature for 24 h. The reaction mixture was quenched with  $\text{NH}_4\text{Cl}$  (20mL) and extracted with DCM (3 x 40mL) after evaporation of THF. After drying the solvent mixture over sodium sulfate, the solvents were removed to isolate the crude alcohol. To the solution of crude alcohol in anhydrous DCM (10 mL) at room temperature,  $\text{BF}_3 \cdot \text{Et}_2\text{O}$  (0.1 mL) was added dropwise under nitrogen, and the reaction mixture was stirred for 10 min at room temperature to perform an intramolecular ring-closure reaction. After 10 min, a saturated aqueous  $\text{NH}_4\text{Cl}$  solution was added to the reaction mixture, and was extracted with DCM (3 x 50 mL). The organic layer was dried over anhydrous  $\text{Na}_2\text{SO}_4$ , filtered, and removed under reduced pressure to afford a residue which was purified

by silica gel column chromatography (hexanes) to give dihydro precursor **14** (170 mg, crude). *p*-Chloranil (110 mg, 451.13 μmol) was added to the solution of **14** (77 mg, 112.78 μmol) in dry toluene (10 mL) under nitrogen, and the reaction mixture was stirred at 110 °C for 24 h. Once the starting material was consumed (as monitored by TLC), the toluene was removed in vacuo, and the crude was purified by silica gel column chromatography (hexanes:DCM, 95:5) to afford target compound **3** as a dark-green solid (70 mg, 91% yield):  $R_f = 0.3$  (10% DCM/hexanes). mp: 253 °C.  $^1\text{H}$  NMR (400 MHz,  $\text{CDCl}_3$ )  $\delta$  9.09 (s, 1H), 8.69 (d,  $J = 9.2$  Hz, 1H), 8.56 (d,  $J = 8.2$  Hz, 1H), 7.67 (dd,  $J = 7.4, 3.5$  Hz, 2H), 7.62 – 7.58 (m, 1H), 7.54 (d,  $J = 9.1$  Hz, 1H), 7.48 – 7.44 (m, 2H), 7.41 (s, 1H), 7.30 – 7.27 (m, 1H), 7.18 – 7.11 (m, 4H), 4.41 (q,  $J = 7.1$  Hz, 2H), 2.52 (s, 3H), 2.01 (s, 6H), 1.53 (t,  $J = 6.9$  Hz, 3H).  $^{13}\text{C}\{^1\text{H}\}$  NMR (100 MHz,  $\text{CDCl}_3$ ):  $\delta$  157.9, 145.5, 142.5, 140.8, 137.8, 137.7, 137.3, 136.9, 134.1, 134.0, 131.4, 131.1, 130.9, 129.7, 129.7, 129.1, 129.0, 128.8, 128.5, 128.2, 128.1, 127.5, 126.3, 124.6, 124.3, 123.8, 123.4, 122.4, 121.5, 120.9, 120.1, 118.4, 117.7, 113.3, 65.1, 21.4, 20.1, 14.5.  $^{19}\text{F}$  NMR (376 MHz,  $\text{CDCl}_3$ )  $\delta$  -135.46 (d,  $J = 19.1$  Hz), -155.64 (t,  $J = 19.7$  Hz), -161.73 (t,  $J = 19.1$  Hz). HRMS (ESI)  $m/z$ :  $[\text{M}]^+$  Calcd for  $\text{C}_{45}\text{H}_{29}\text{F}_5\text{O}$  680.2139, found 680.2124 (error: -2.2 ppm).

### 1.3 NMR spectra

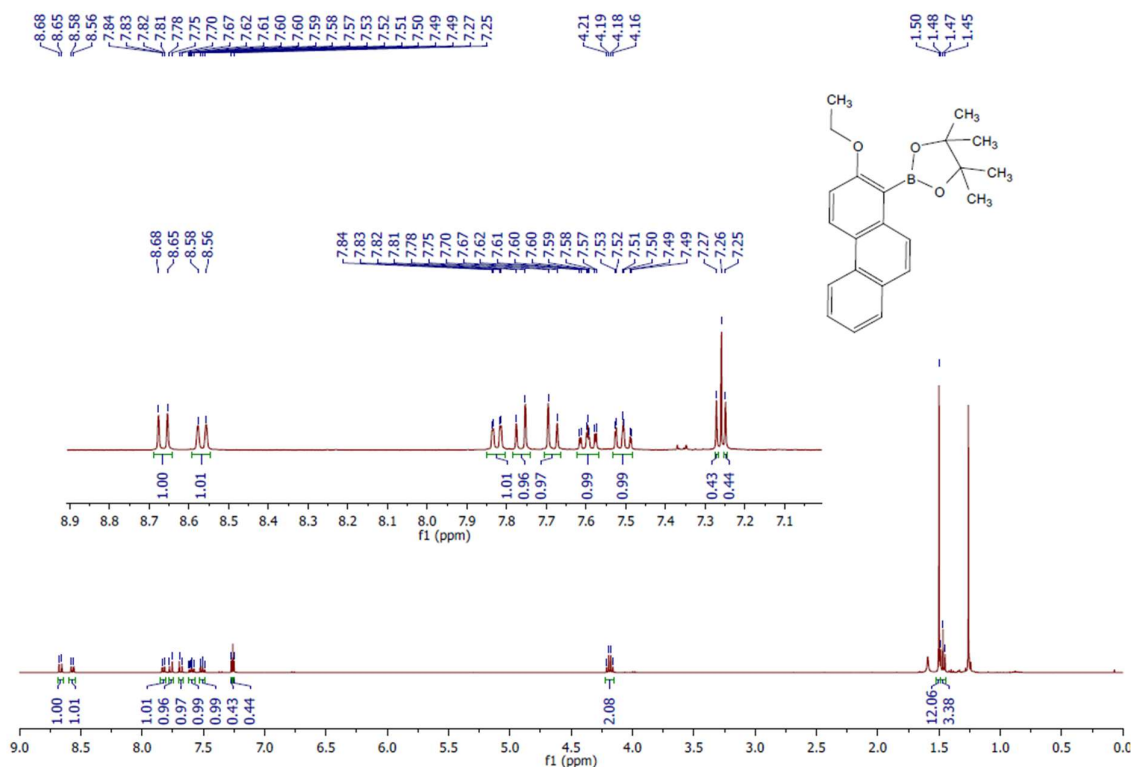

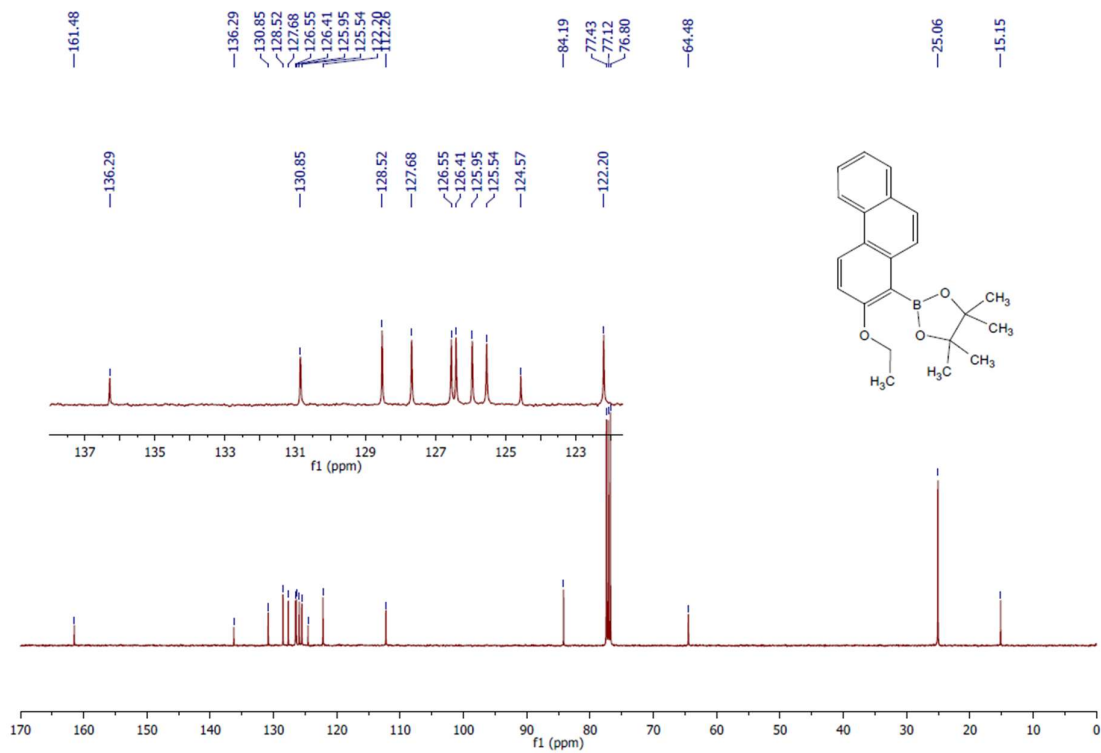

**Fig. S2.**  $^{13}\text{C}\{^1\text{H}\}$  NMR spectrum of **5** (in  $\text{CDCl}_3$ , 400 MHz, 298 K).

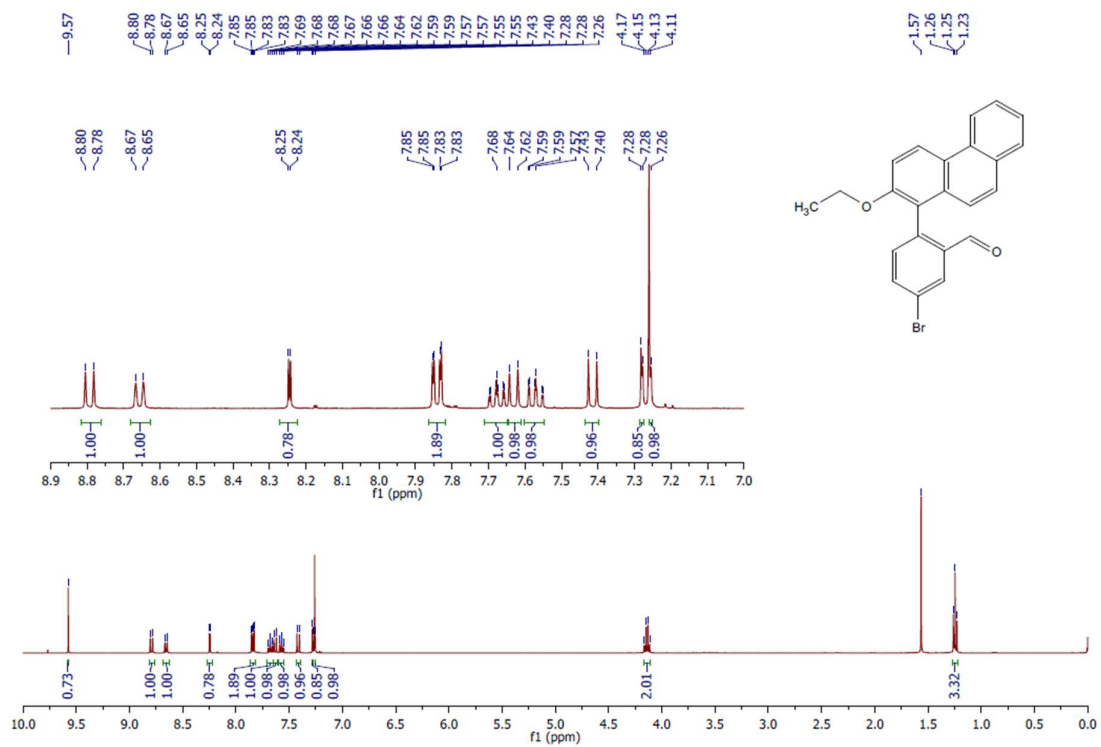

**Fig. S3.**  $^1\text{H}$  NMR spectrum of **7** (in  $\text{CDCl}_3$ , 400 MHz, 298 K).

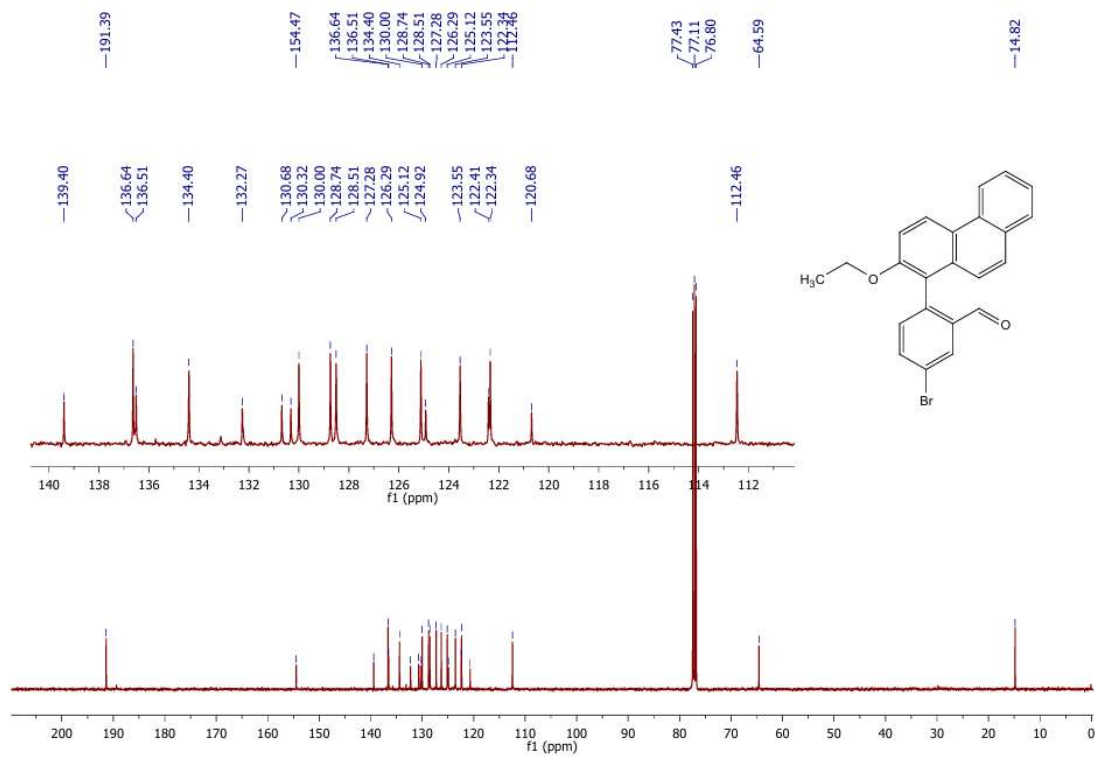

Fig. S4.  $^{13}\text{C}\{^1\text{H}\}$  NMR spectrum of **7** (in  $\text{CDCl}_3$ , 400 MHz, 298 K).

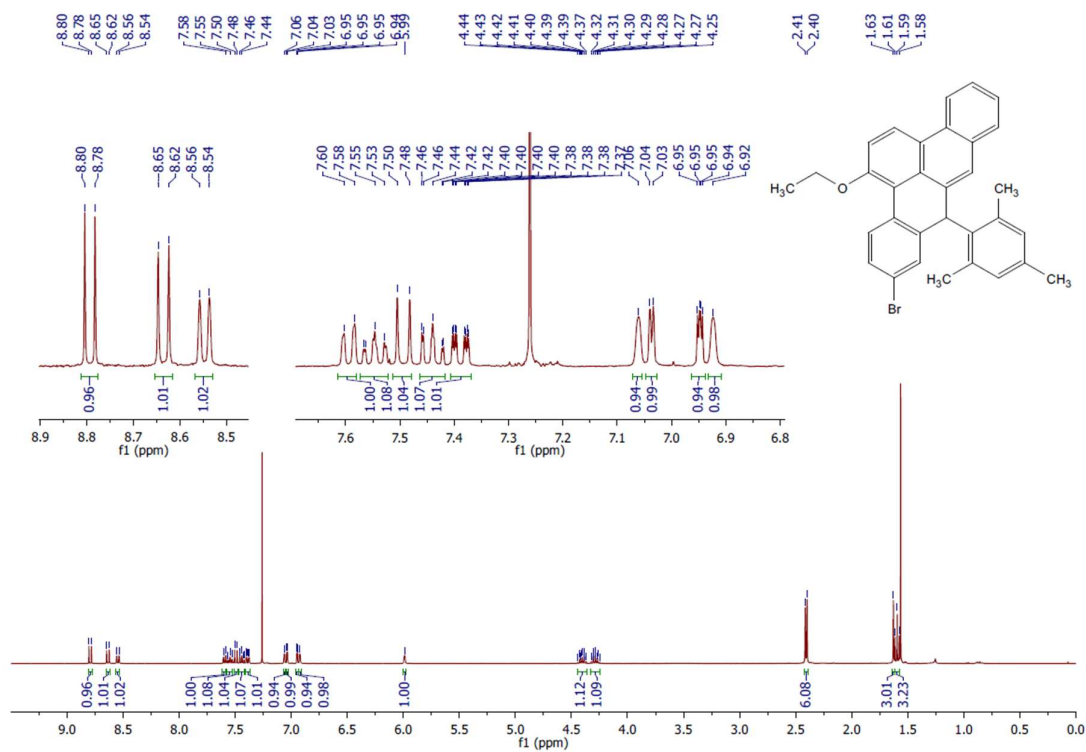

Fig. S5.  $^1\text{H}$  NMR spectrum of **9** (in  $\text{CDCl}_3$ , 400 MHz, 298 K).

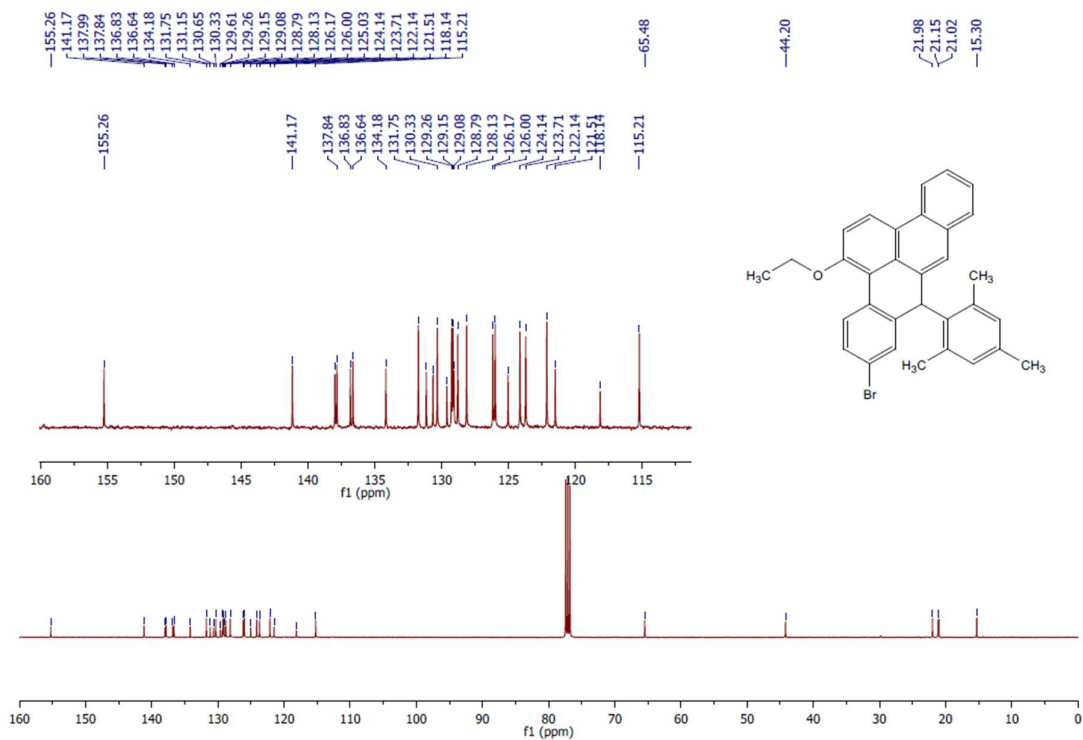

**Fig. S6.**  $^{13}\text{C}\{^1\text{H}\}$  NMR spectrum of **9** (in  $\text{CDCl}_3$ , 400 MHz, 298 K).

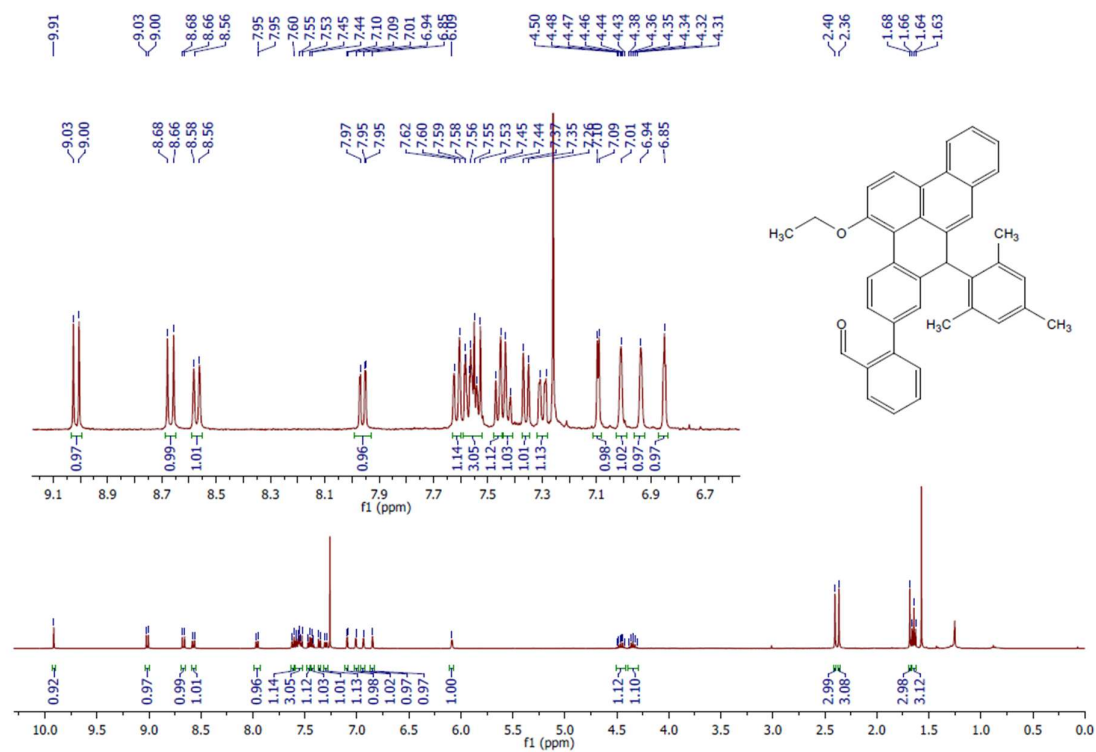

**Fig. S7.**  $^1\text{H}$  NMR spectrum of **11** (in  $\text{CDCl}_3$ , 400 MHz, 298 K).

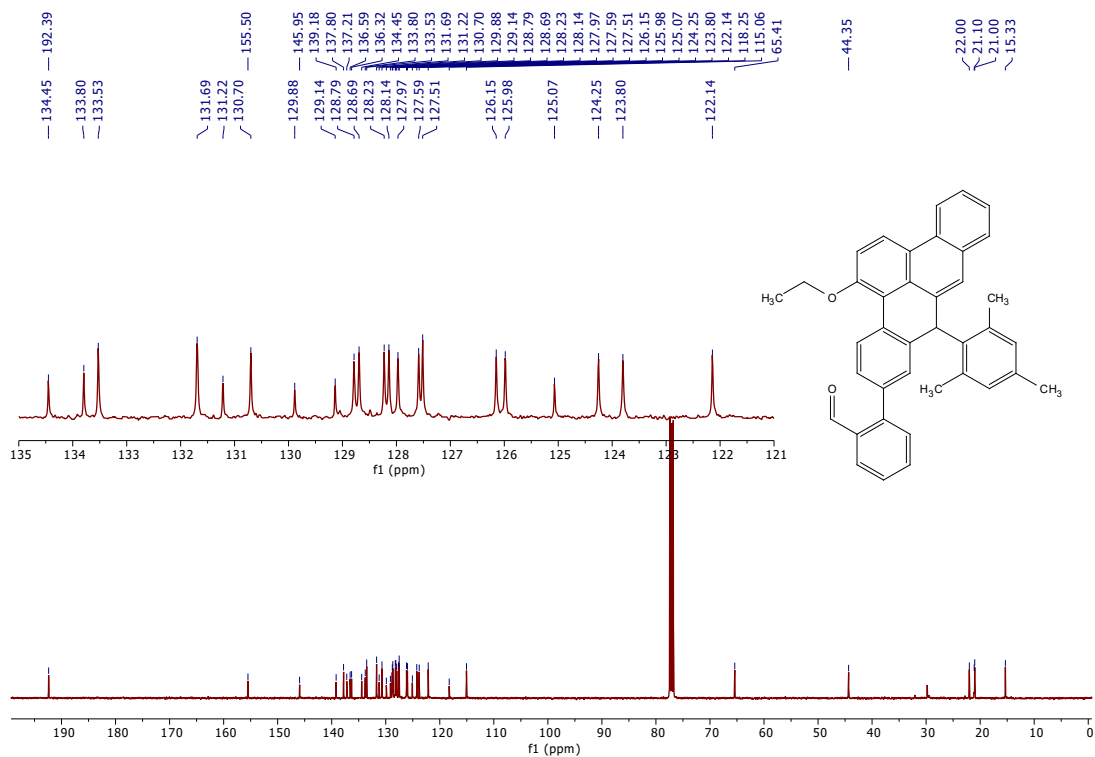

Fig. S8.  $^{13}\text{C}\{^1\text{H}\}$  NMR spectrum of **11** (in  $\text{CDCl}_3$ , 400 MHz, 298 K).

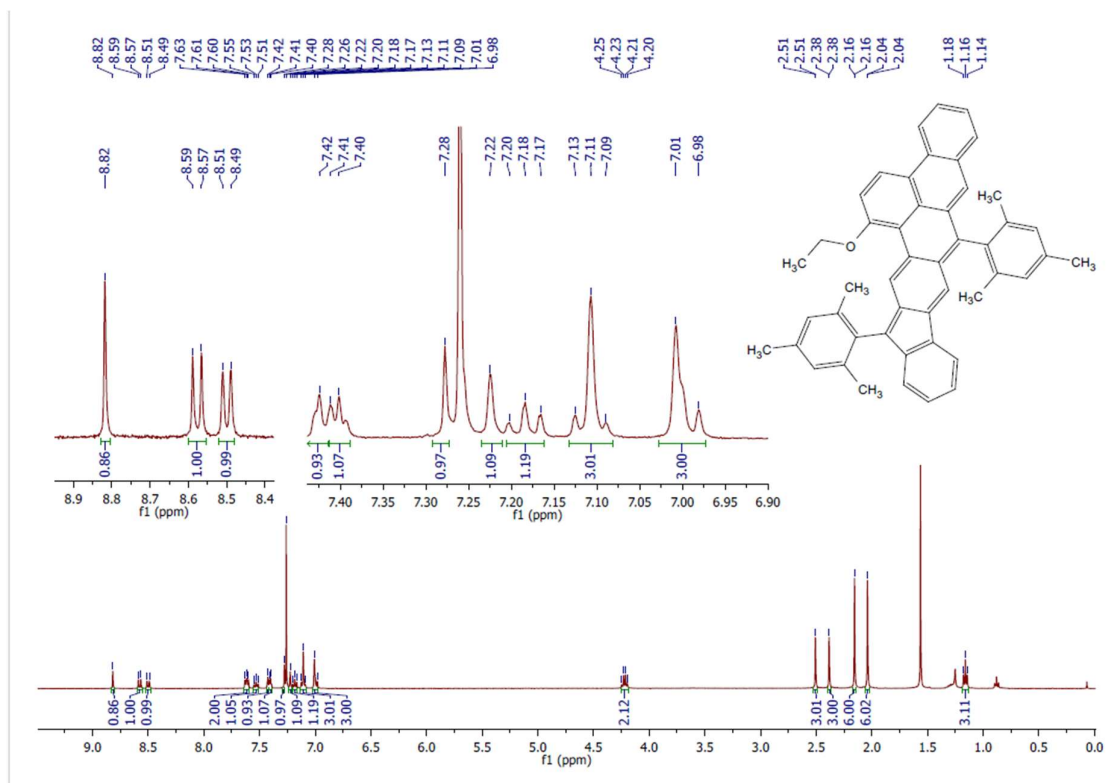

Fig. S9.  $^1\text{H}$  NMR spectrum of **1** (in  $\text{CDCl}_3$ , 400 MHz, 298 K).

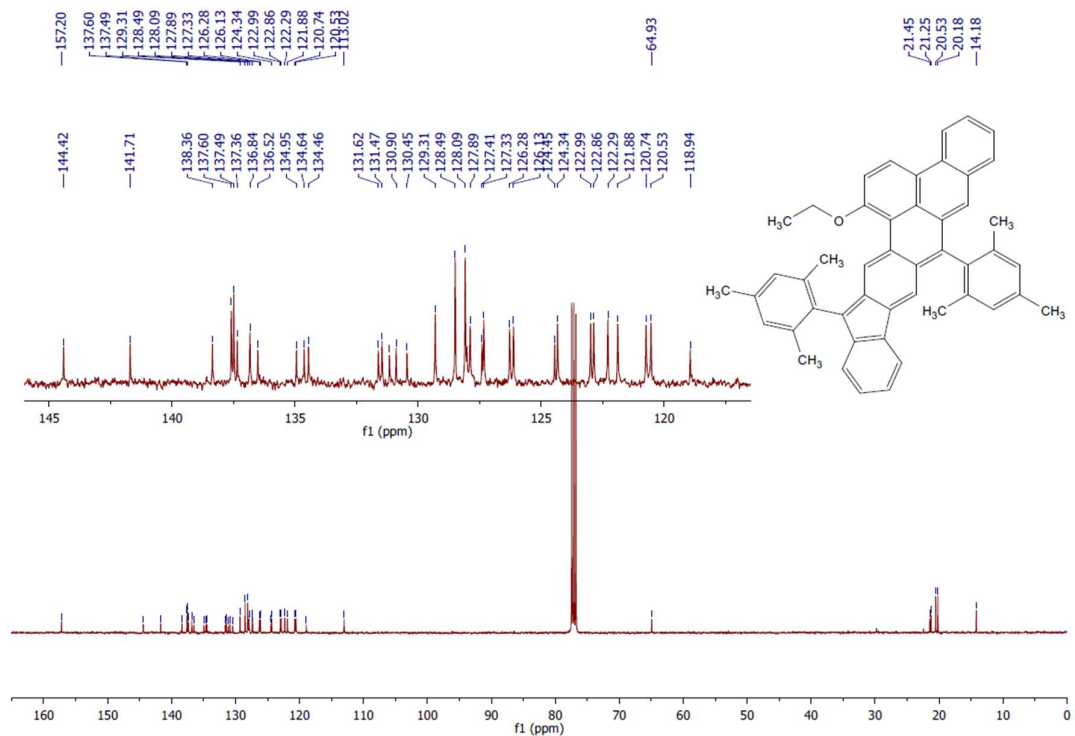

Fig. S10.  $^{13}\text{C}\{^1\text{H}\}$  NMR spectrum of **1** (in  $\text{CDCl}_3$ , 400 MHz, 298 K).

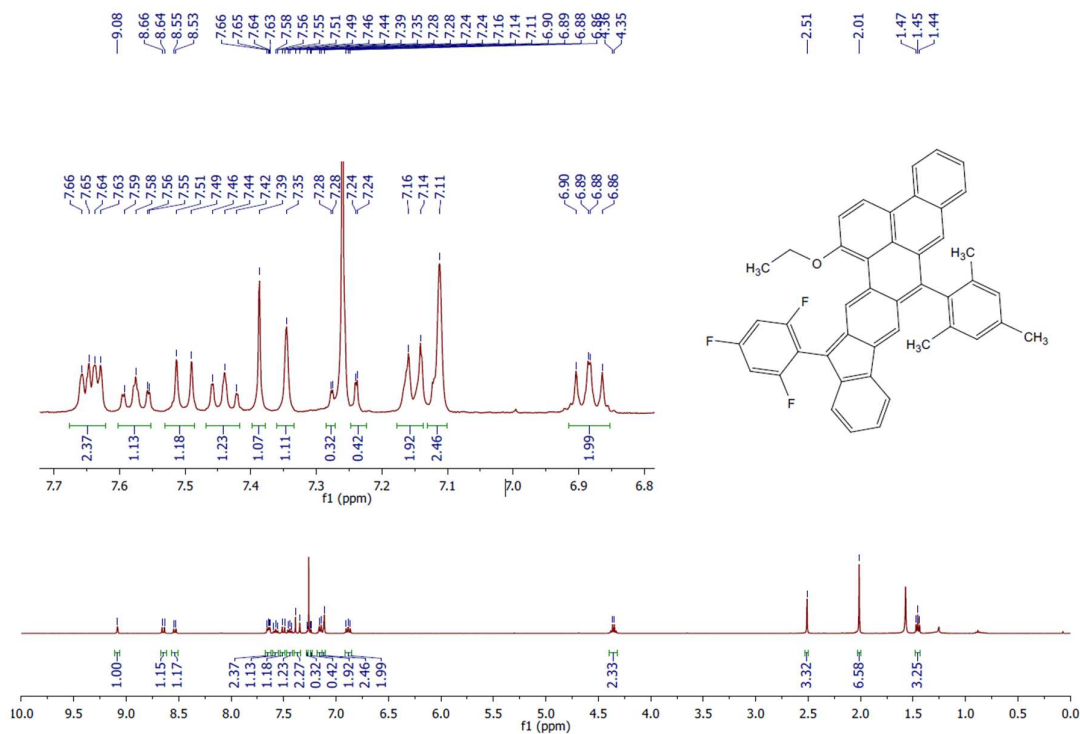

Fig. S11.  $^1\text{H}$  NMR spectrum of **2** (in  $\text{CDCl}_3$ , 400 MHz, 298 K).

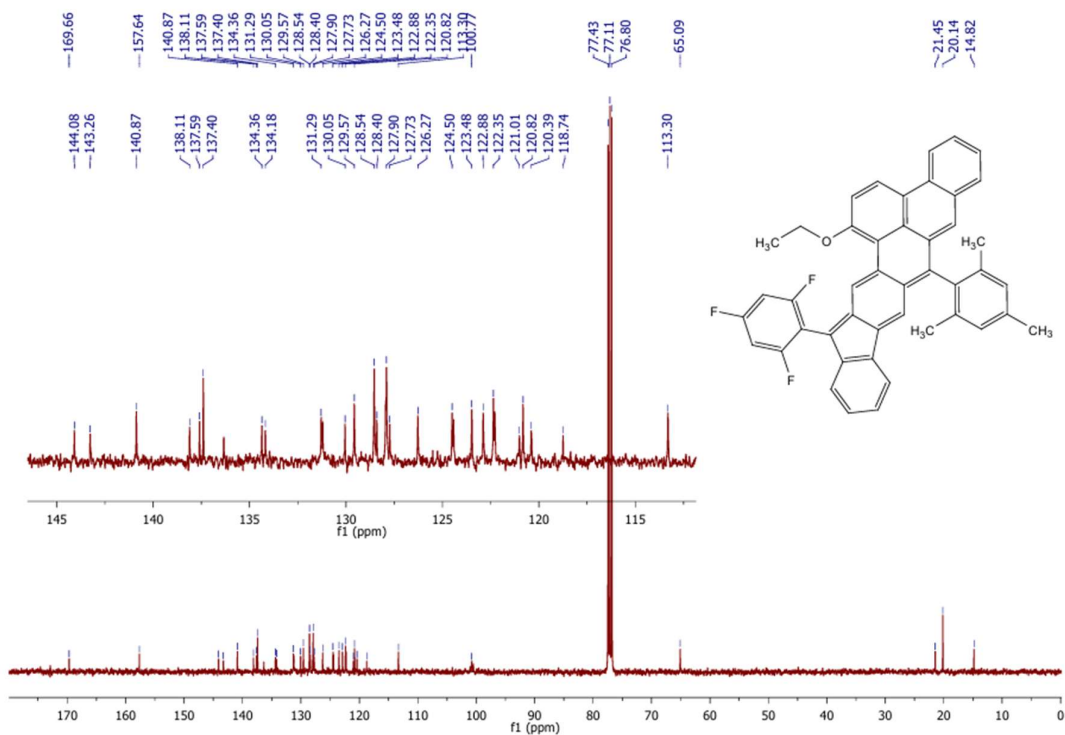

**Fig. S12.**  $^{13}\text{C}\{^1\text{H}\}$  NMR spectrum of **2** (in  $\text{CDCl}_3$ , 400 MHz, 298 K).

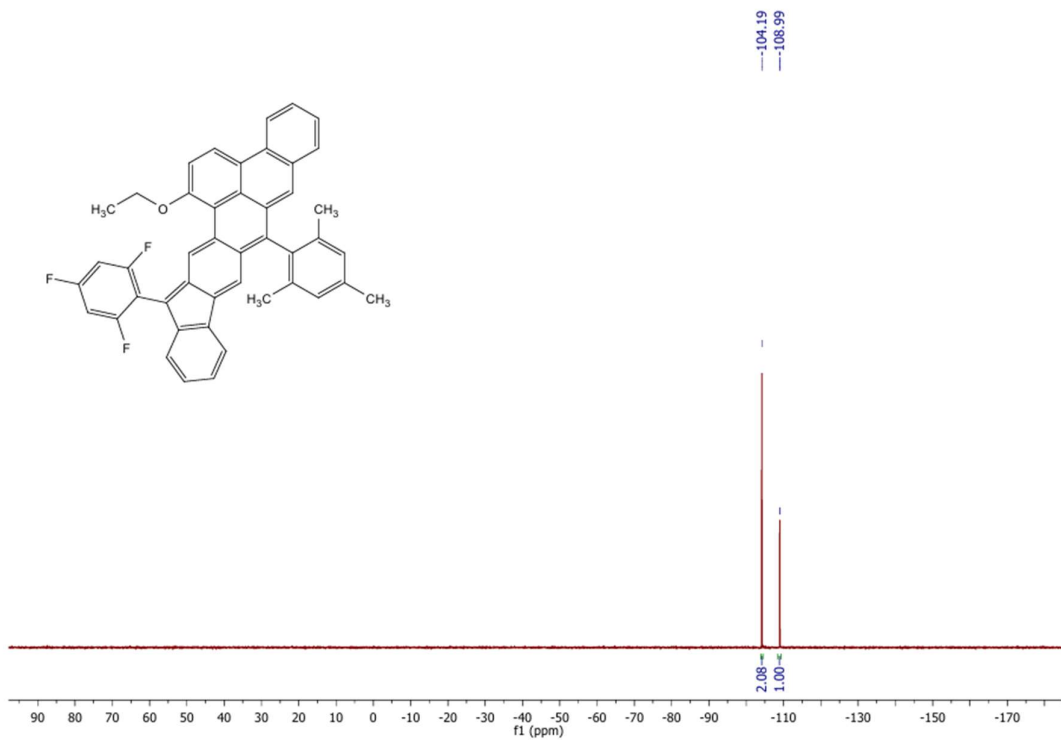

**Fig. S13.**  $^{19}\text{F}$  NMR spectrum of **2** (in  $\text{CDCl}_3$ , 400 MHz, 298 K).



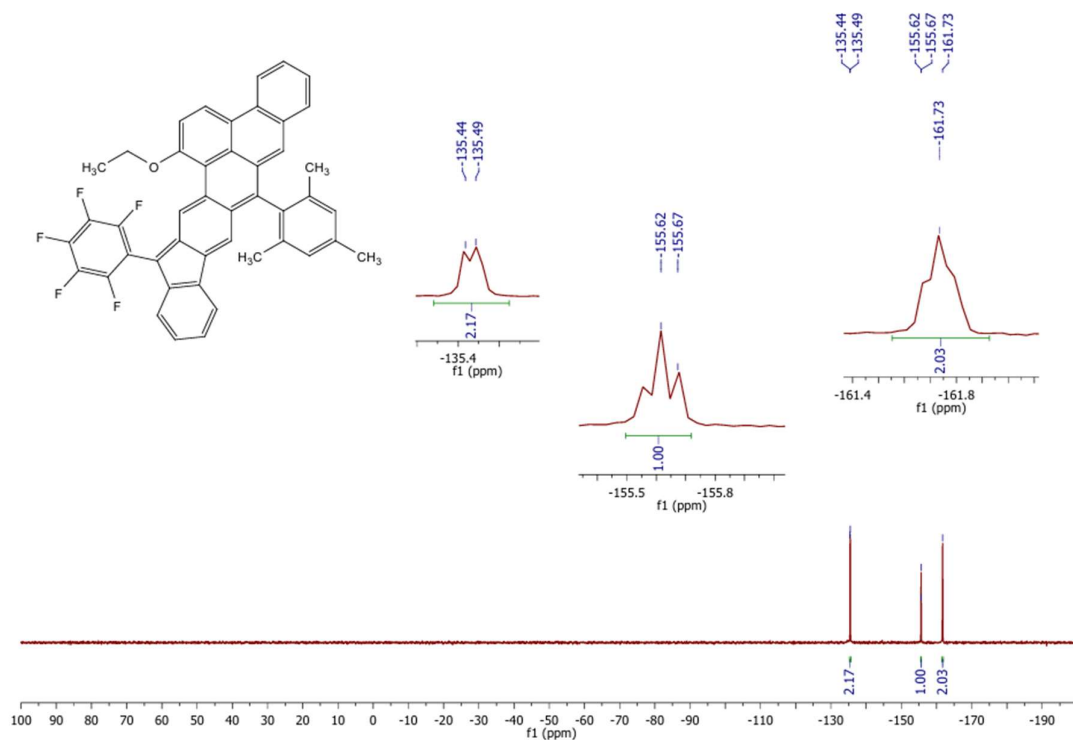

**Fig. S16.**  $^{19}\text{F}$  NMR spectrum of **3** (in  $\text{CDCl}_3$ , 400 MHz, 298 K)

## 2. X-ray crystallographic analysis

A suitable single crystal of **1** was selected using paratone oil and mounted on glass fiber with the help of gum. The intensity data and geometric parameters of these crystals were garnered with the help of Bruker D8 Venture X-ray diffractometer having a micro-focus sealed X-ray tube Mo-K $\alpha$  ( $\lambda = 0.71073 \text{ \AA}$ ) source of X-rays along with a PHOTON 100 detector with inclining Phi and Omega (width of 0.5 for one frame) working at a scan speed of 10 s per frame. The crystal was kept at 298 K during data collection. Data acquisition and extraction were accomplished by utilizing Bruker Apex-3 and Bruker SAINT software packages using a narrow-frame algorithm.<sup>2</sup> By utilizing OLex2,<sup>3</sup> the crystal structure was solved with the help of olex2.solve<sup>4</sup> structure solution program by employing intrinsic Phasing methods and crystal structure refinement was done with the SHELXL<sup>5</sup> refinement package by putting into use Least Squares minimization. Refinement of all non-hydrogen atoms was completed with the help of anisotropic thermal parameters.

**Table S1.** X-ray crystallographic information of **1**.

|                                                                   |                                                                |
|-------------------------------------------------------------------|----------------------------------------------------------------|
| CCDC number                                                       | 2538833                                                        |
| Empirical formula                                                 | C <sub>48</sub> H <sub>40</sub> O                              |
| Formula weight                                                    | 632.80                                                         |
| Temperature [K]                                                   | 298                                                            |
| Crystal system                                                    | triclinic                                                      |
| Space group (number)                                              | $P\bar{1}$ (2)                                                 |
| <i>a</i> [Å]                                                      | 9.0236(14)                                                     |
| <i>b</i> [Å]                                                      | 16.688(3)                                                      |
| <i>c</i> [Å]                                                      | 26.510(5)                                                      |
| $\alpha$ [°]                                                      | 96.376(8)                                                      |
| $\beta$ [°]                                                       | 93.001(5)                                                      |
| $\gamma$ [°]                                                      | 98.414(5)                                                      |
| Volume [Å <sup>3</sup> ]                                          | 3915.1(12)                                                     |
| <i>Z</i>                                                          | 4                                                              |
| $\rho_{\text{calc}}$ [gcm <sup>-3</sup> ]                         | 1.074                                                          |
| $\mu$ [mm <sup>-1</sup> ]                                         | 0.062                                                          |
| <i>F</i> (000)                                                    | 1344.0                                                         |
| Crystal size [mm <sup>3</sup> ]                                   | 0.056×0.123×0.325                                              |
| Crystal colour                                                    | metallic brownish brown                                        |
| Crystal shape                                                     | plate                                                          |
| Radiation                                                         | MoK $\alpha$ ( $\lambda=0.71073$ Å)                            |
| 2 $\theta$ range [°]                                              | 3.73 to 51.75 (0.81 Å)                                         |
| Index ranges                                                      | -10 ≤ <i>h</i> ≤ 11, -20 ≤ <i>k</i> ≤ 20, -32 ≤ <i>l</i> ≤ 32  |
| Reflections collected                                             | 23803                                                          |
| Independent reflections                                           | 15178, $R_{\text{int}} = 0.0538$ , $R_{\text{sigma}} = 0.1075$ |
| Data/Restraints/Parameters                                        | 14461 / 0 / 897                                                |
| Absorption correction T <sub>min</sub> /T <sub>max</sub> (method) | 0.9910 / 0.9970<br>(multi-scan)                                |
| Goodness-of-fit on $F^2$                                          | 1.026                                                          |
| Final <i>R</i> indexes<br>[ $I \geq 2\sigma(I)$ ]                 | $R_1 = 0.0905$<br>$wR_2 = 0.2061$                              |
| Final <i>R</i> indexes<br>[all data]                              | $R_1 = 0.1624$<br>$wR_2 = 0.2396$                              |
| Largest peak/hole [eÅ <sup>-3</sup> ]                             | 0.29/-0.25                                                     |

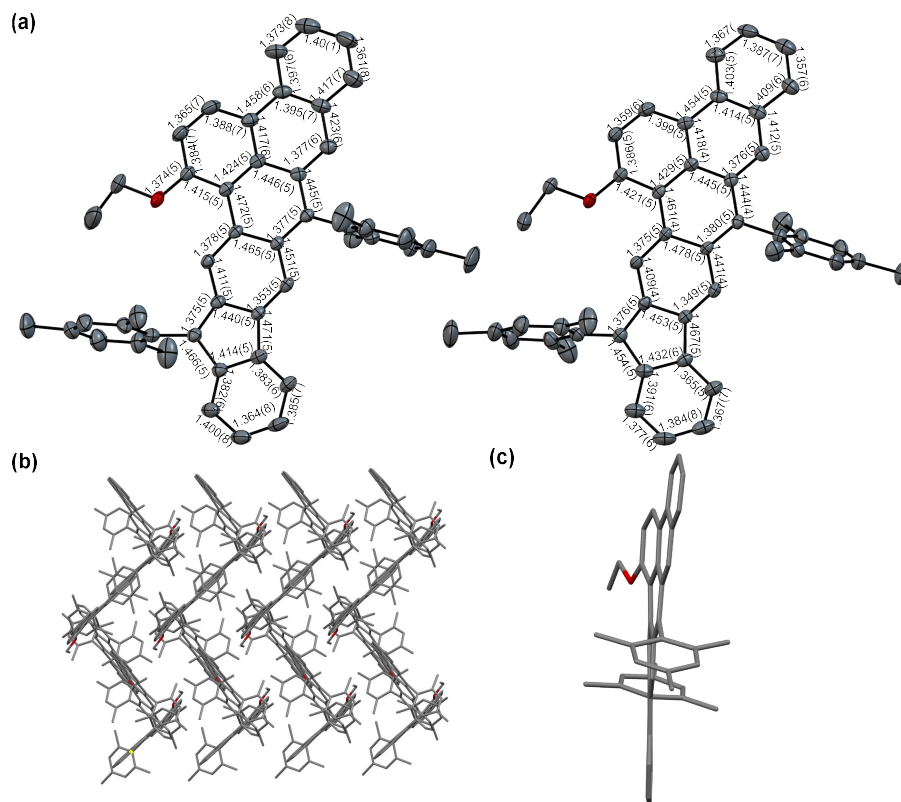

**Fig. S17.** (a) ORTEP drawing with thermal ellipsoids at 30% probability level, showing the core bond lengths with e.s.d values for **1**; (b) Packing of **1**; (c) Side view of **1**.

### 3. DFT calculations:

Density functional theory (DFT) calculations, in the gas phase, were performed with Gaussian 09 package using a high-performance computing cluster facility of IIT Ropar at the B3LYP level of theory with basis set 6-31G(d,p).<sup>6</sup> Optimization of the molecular geometries for **1**, taken from x-ray crystallographic data, and **1** was done by restricted B3LYP, and unrestricted B3LYP wavefunctions using broken symmetry formalism.<sup>7</sup> NICS(1)<sub>zz</sub><sup>8</sup> (standard GIAO method), and Natural Population Analysis (NPA) were calculated for the optimized closed-shell structure of **1**, **2** and **3** using the more reliable BHandHLYP<sup>9</sup> functional and 6-31G(d,p) basis set in a SMD solvation model. The reported NICS(1)<sub>zz</sub> indices are the average of two positions (1 Å above and below the plane) for **1**, **2** and **3**. The excitation energies of **1**, **2**, and **3** were computed using time-dependent density functional theory (TDDFT) for the closed-shell optimized structure in the gas phase. Molecular orbital contributions of **1**, **2**, and **3** were determined using GaussSum 3.0 package.<sup>10</sup> Anisotropy of the induced current density (ACID) plots were generated at BHandHLYP/6-31G(d,p) in the SMD solvation model (in DMF) following Herges's protocol.<sup>11</sup>

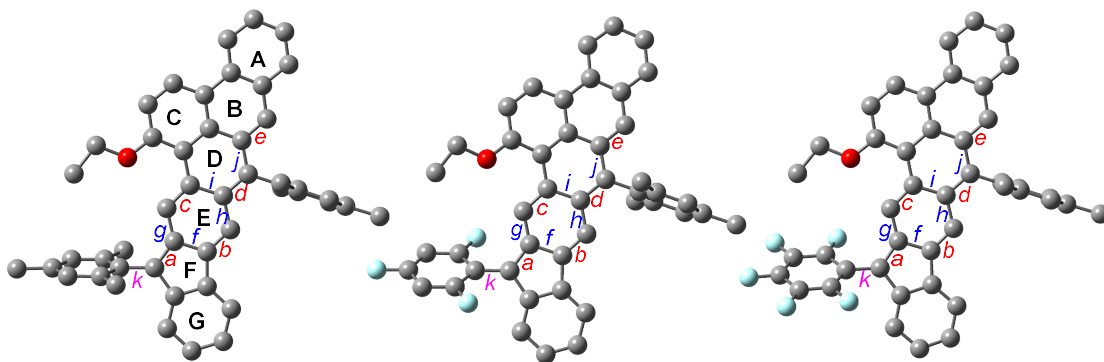

**Table S2.** Comparison of C-C bond lengths (Å) for the quinoidal core of **1**, **2** & **3** using DFT optimised files at the BHandHLYP level of theory with 6-31G(d,p) basis set in a SMD solvation model in DMF.

| Bonds | <i>a</i> | <i>b</i> | <i>c</i> | <i>d</i> | <i>e</i> | <i>f</i> | <i>g</i> | <i>h</i> | <i>i</i> | <i>j</i> | <i>k</i> |
|-------|----------|----------|----------|----------|----------|----------|----------|----------|----------|----------|----------|
| 1     | 1.368    | 1.340    | 1.365    | 1.362    | 1.366    | 1.451    | 1.425    | 1.449    | 1.470    | 1.447    | 1.480    |
| 2     | 1.372    | 1.341    | 1.365    | 1.364    | 1.367    | 1.450    | 1.423    | 1.445    | 1.467    | 1.446    | 1.465    |
| 3     | 1.375    | 1.341    | 1.369    | 1.365    | 1.368    | 1.449    | 1.424    | 1.443    | 1.468    | 1.443    | 1.464    |

**Table S3.** Comparison of NICS(1)<sub>zz</sub> (ppm) for **1** in different solvents.

| <b>1</b>  | A      | B      | C      | D    | E     | F     | G      |
|-----------|--------|--------|--------|------|-------|-------|--------|
| Gas phase | -27.40 | -15.56 | -24.63 | 5.53 | 0.05  | 0.43  | -24.41 |
| n-Hexane  | -27.43 | -15.66 | -24.52 | 5.43 | -0.25 | -0.33 | -24.65 |
| DCM       | -27.48 | -15.83 | -24.32 | 5.12 | -0.95 | -1.76 | -25.05 |
| DMF       | -27.49 | -15.85 | -24.22 | 4.96 | -1.25 | -2.29 | -25.17 |

**Table S4.** Comparison of NICS(1)<sub>zz</sub> (ppm) for **2** in different solvents.

| <b>2</b>  | A      | B      | C      | D    | E     | F     | G      |
|-----------|--------|--------|--------|------|-------|-------|--------|
| Gas phase | -27.24 | -15.35 | -24.16 | 5.15 | -0.76 | 0.65  | -24.41 |
| n-Hexane  | -27.32 | -15.53 | -24.05 | 4.89 | -1.27 | -0.23 | -24.73 |
| DCM       | -27.37 | -15.74 | -23.80 | 4.39 | -2.28 | -2.15 | -25.19 |
| DMF       | -27.36 | -15.75 | -23.70 | 4.19 | -2.67 | -2.75 | -25.32 |

**Table S5.** Comparison of NICS(1)<sub>zz</sub> (ppm) for **3** in different solvents.

| <b>3</b>  | A      | B      | C      | D    | E     | F     | G      |
|-----------|--------|--------|--------|------|-------|-------|--------|
| Gas phase | -27.40 | -15.86 | -24.26 | 4.69 | -1.54 | -0.36 | -24.77 |
| n-Hexane  | -27.50 | -16.10 | -24.21 | 4.34 | -2.22 | -1.38 | -25.09 |
| DCM       | -27.52 | -16.28 | -23.93 | 3.75 | -3.31 | -3.18 | -25.55 |
| DMF       | -27.46 | -16.22 | -23.77 | 3.58 | -3.66 | -3.79 | -25.69 |

**Table S6.** Relative energies of **1** in closed- and open-shell states.

| Compound 1                  | Electronic energy (Hartree) | Electronic energy (kcal mol <sup>-1</sup> ) |
|-----------------------------|-----------------------------|---------------------------------------------|
| <i>Singlet closed-shell</i> | -1928.561632                | -1210172.424                                |
| <i>Singlet open-shell</i>   | -1928.561632                | -1210172.424                                |
| <i>Triplet open-shell</i>   | -1928.540278                | -1210159.024                                |

**Compound 1:**  $\Delta E_{\text{Singlet-Triplet}} = -13.39$  kcal/mol

**Table S7.** Relative energies of **2** in closed- and open-shell states.

| Compound 2                  | Electronic energy (Hartree) | Electronic energy (kcal mol <sup>-1</sup> ) |
|-----------------------------|-----------------------------|---------------------------------------------|
| <i>Singlet closed-shell</i> | -2108.296224                | -1322956.881                                |
| <i>Singlet open-shell</i>   | -2108.296224                | -1322955.881                                |
| <i>Triplet open-shell</i>   | -2108.274834                | -1322942.458                                |

**Compound 2:**  $\Delta E_{\text{Singlet-Triplet}} = -13.42$  kcal/mol

**Table S8.** Relative energies of **3** in closed- and open-shell states.

| Compound 3                  | Electronic energy (Hartree) | Electronic energy (kcal mol <sup>-1</sup> ) |
|-----------------------------|-----------------------------|---------------------------------------------|
| <i>Singlet closed-shell</i> | -2306.730124                | -1447473.153                                |
| <i>Singlet open-shell</i>   | -2306.730124                | -1447473.153                                |
| <i>Triplet open-shell</i>   | -2306.707754                | -1447459.116                                |

**Compound 3:**  $\Delta E_{\text{Singlet-Triplet}} = -14.03$  kcal/mol

### 3.1 NPA Charges:

#### Compound 1.

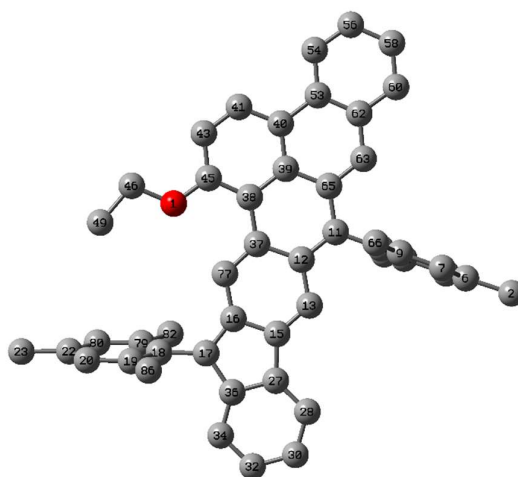

**Table S9.** Natural Population of **1** in DMF solvent.

| Natural ----- |    |          |         |         |         |         |
|---------------|----|----------|---------|---------|---------|---------|
| Atom          | No | Charge   | Core    | Valence | Rydberg | Total   |
| O             | 1  | -0.57294 | 1.99971 | 6.55936 | 0.01387 | 8.57294 |
| C             | 2  | -0.69985 | 1.99940 | 4.69184 | 0.00860 | 6.69985 |
| H             | 3  | 0.25118  | 0.00000 | 0.74742 | 0.00140 | 0.74882 |
| H             | 4  | 0.24612  | 0.00000 | 0.75258 | 0.00131 | 0.75388 |
| H             | 5  | 0.24662  | 0.00000 | 0.75206 | 0.00132 | 0.75338 |
| C             | 6  | -0.01579 | 1.99902 | 4.00039 | 0.01637 | 6.01579 |
| C             | 7  | -0.25716 | 1.99896 | 4.24438 | 0.01381 | 6.25716 |
| H             | 8  | 0.24704  | 0.00000 | 0.75142 | 0.00154 | 0.75296 |
| C             | 9  | 0.00456  | 1.99895 | 3.98057 | 0.01591 | 5.99544 |
| C             | 10 | -0.09152 | 1.99891 | 4.07478 | 0.01783 | 6.09152 |
| C             | 11 | 0.04818  | 1.99898 | 3.93295 | 0.01989 | 5.95182 |
| C             | 12 | -0.05474 | 1.99891 | 4.03987 | 0.01596 | 6.05474 |
| C             | 13 | -0.15900 | 1.99898 | 4.14621 | 0.01381 | 6.15900 |
| H             | 14 | 0.26182  | 0.00000 | 0.73648 | 0.00170 | 0.73818 |
| C             | 15 | -0.04485 | 1.99902 | 4.02819 | 0.01764 | 6.04485 |
| C             | 16 | -0.04885 | 1.99895 | 4.03315 | 0.01675 | 6.04885 |
| C             | 17 | -0.03482 | 1.99896 | 4.01547 | 0.02039 | 6.03482 |
| C             | 18 | -0.07991 | 1.99890 | 4.06433 | 0.01668 | 6.07991 |
| C             | 19 | 0.00370  | 1.99898 | 3.98165 | 0.01567 | 5.99630 |
| C             | 20 | -0.26148 | 1.99896 | 4.24875 | 0.01376 | 6.26148 |
| H             | 21 | 0.24562  | 0.00000 | 0.75283 | 0.00155 | 0.75438 |
| C             | 22 | -0.01783 | 1.99902 | 4.00233 | 0.01648 | 6.01783 |
| C             | 23 | -0.69962 | 1.99940 | 4.69163 | 0.00859 | 6.69962 |
| H             | 24 | 0.25062  | 0.00000 | 0.74796 | 0.00141 | 0.74938 |
| H             | 25 | 0.24561  | 0.00000 | 0.75308 | 0.00131 | 0.75439 |
| H             | 26 | 0.24622  | 0.00000 | 0.75245 | 0.00133 | 0.75378 |
| C             | 27 | -0.06233 | 1.99899 | 4.04683 | 0.01652 | 6.06233 |
| C             | 28 | -0.21886 | 1.99903 | 4.20519 | 0.01463 | 6.21886 |
| H             | 29 | 0.25502  | 0.00000 | 0.74359 | 0.00139 | 0.74498 |
| C             | 30 | -0.26777 | 1.99913 | 4.25243 | 0.01622 | 6.26777 |
| H             | 31 | 0.25240  | 0.00000 | 0.74634 | 0.00126 | 0.74760 |
| C             | 32 | -0.24597 | 1.99912 | 4.23077 | 0.01607 | 6.24597 |
| H             | 33 | 0.25273  | 0.00000 | 0.74601 | 0.00127 | 0.74727 |
| C             | 34 | -0.24853 | 1.99903 | 4.23444 | 0.01506 | 6.24853 |
| H             | 35 | 0.25488  | 0.00000 | 0.74363 | 0.00150 | 0.74512 |
| C             | 36 | -0.04090 | 1.99899 | 4.02537 | 0.01654 | 6.04090 |
| C             | 37 | -0.04102 | 1.99903 | 4.02453 | 0.01746 | 6.04102 |
| C             | 38 | -0.09381 | 1.99897 | 4.07866 | 0.01619 | 6.09381 |
| C             | 39 | -0.00463 | 1.99902 | 3.99076 | 0.01485 | 6.00463 |
| C             | 40 | -0.06698 | 1.99902 | 4.05229 | 0.01566 | 6.06698 |
| C             | 41 | -0.18557 | 1.99908 | 4.17138 | 0.01511 | 6.18557 |
| H             | 42 | 0.25622  | 0.00000 | 0.74226 | 0.00153 | 0.74378 |
| C             | 43 | -0.31792 | 1.99905 | 4.30447 | 0.01441 | 6.31792 |
| H             | 44 | 0.26577  | 0.00000 | 0.73269 | 0.00154 | 0.73423 |

|   |    |          |         |         |         |         |
|---|----|----------|---------|---------|---------|---------|
| C | 45 | 0.38739  | 1.99882 | 3.59077 | 0.02302 | 5.61261 |
| C | 46 | -0.09668 | 1.99927 | 4.08115 | 0.01627 | 6.09668 |
| H | 47 | 0.22322  | 0.00000 | 0.77430 | 0.00248 | 0.77678 |
| H | 48 | 0.22342  | 0.00000 | 0.77407 | 0.00250 | 0.77658 |
| C | 49 | -0.70579 | 1.99946 | 4.69727 | 0.00906 | 6.70579 |
| H | 50 | 0.24004  | 0.00000 | 0.75809 | 0.00187 | 0.75996 |
| H | 51 | 0.23919  | 0.00000 | 0.75886 | 0.00194 | 0.76081 |
| H | 52 | 0.24854  | 0.00000 | 0.75032 | 0.00115 | 0.75146 |
| C | 53 | -0.02410 | 1.99901 | 4.00956 | 0.01553 | 6.02410 |
| C | 54 | -0.23153 | 1.99908 | 4.21805 | 0.01440 | 6.23153 |
| H | 55 | 0.25277  | 0.00000 | 0.74572 | 0.00150 | 0.74723 |
| C | 56 | -0.23307 | 1.99911 | 4.21770 | 0.01625 | 6.23307 |
| H | 57 | 0.25683  | 0.00000 | 0.74190 | 0.00127 | 0.74317 |
| C | 58 | -0.25293 | 1.99910 | 4.23768 | 0.01615 | 6.25293 |
| H | 59 | 0.25723  | 0.00000 | 0.74151 | 0.00126 | 0.74277 |
| C | 60 | -0.21156 | 1.99907 | 4.19726 | 0.01523 | 6.21156 |
| H | 61 | 0.25609  | 0.00000 | 0.74245 | 0.00147 | 0.74391 |
| C | 62 | -0.07712 | 1.99902 | 4.06200 | 0.01610 | 6.07712 |
| C | 63 | -0.16615 | 1.99905 | 4.15308 | 0.01401 | 6.16615 |
| H | 64 | 0.26094  | 0.00000 | 0.73728 | 0.00178 | 0.73906 |
| C | 65 | -0.06207 | 1.99898 | 4.04680 | 0.01630 | 6.06207 |
| C | 66 | -0.70167 | 1.99940 | 4.69398 | 0.00829 | 6.70167 |
| H | 67 | 0.25125  | 0.00000 | 0.74729 | 0.00147 | 0.74875 |
| H | 68 | 0.25009  | 0.00000 | 0.74841 | 0.00150 | 0.74991 |
| H | 69 | 0.24655  | 0.00000 | 0.75221 | 0.00124 | 0.75345 |
| C | 70 | -0.25734 | 1.99896 | 4.24456 | 0.01382 | 6.25734 |
| H | 71 | 0.24713  | 0.00000 | 0.75133 | 0.00154 | 0.75287 |
| C | 72 | 0.00415  | 1.99895 | 3.98098 | 0.01592 | 5.99585 |
| C | 73 | -0.70146 | 1.99940 | 4.69375 | 0.00831 | 6.70146 |
| H | 74 | 0.24656  | 0.00000 | 0.75220 | 0.00124 | 0.75344 |
| H | 75 | 0.24985  | 0.00000 | 0.74863 | 0.00152 | 0.75015 |
| H | 76 | 0.25124  | 0.00000 | 0.74728 | 0.00148 | 0.74876 |
| C | 77 | -0.21660 | 1.99905 | 4.20276 | 0.01479 | 6.21660 |
| H | 78 | 0.27073  | 0.00000 | 0.72684 | 0.00243 | 0.72927 |
| C | 79 | 0.00328  | 1.99898 | 3.98200 | 0.01573 | 5.99672 |
| C | 80 | -0.26292 | 1.99896 | 4.25019 | 0.01377 | 6.26292 |
| H | 81 | 0.24595  | 0.00000 | 0.75251 | 0.00155 | 0.75405 |
| C | 82 | -0.69947 | 1.99940 | 4.69177 | 0.00830 | 6.69947 |
| H | 83 | 0.24913  | 0.00000 | 0.74946 | 0.00142 | 0.75087 |
| H | 84 | 0.25004  | 0.00000 | 0.74841 | 0.00156 | 0.74996 |
| H | 85 | 0.24393  | 0.00000 | 0.75480 | 0.00127 | 0.75607 |
| C | 86 | -0.70066 | 1.99940 | 4.69302 | 0.00824 | 6.70066 |
| H | 87 | 0.24442  | 0.00000 | 0.75432 | 0.00126 | 0.75558 |
| H | 88 | 0.24999  | 0.00000 | 0.74858 | 0.00143 | 0.75001 |
| H | 89 | 0.24951  | 0.00000 | 0.74890 | 0.00158 | 0.75049 |

---



---

\* Total \*    0.00000    97.95495    237.25376    0.79129    336.00000

**Compound 2.**

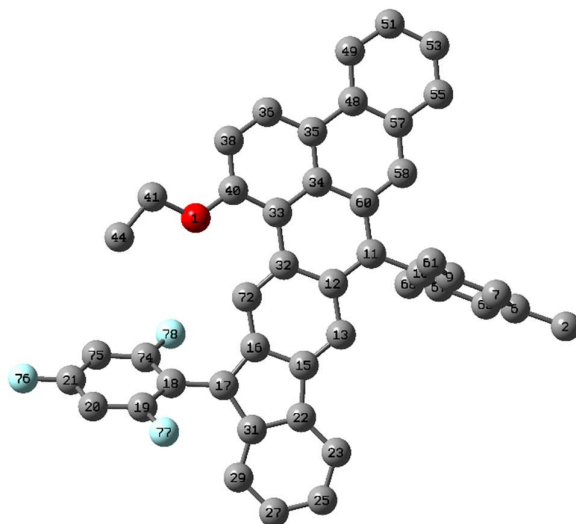

**Table S10.** Natural Population of **2** in DMF solvent

| Natural ----- |        |          |         |         |         |         |
|---------------|--------|----------|---------|---------|---------|---------|
| Atom No       | Charge | Core     | Valence | Rydberg | Total   |         |
| -----         |        |          |         |         |         |         |
| O             | 1      | -0.57247 | 1.99971 | 6.55889 | 0.01387 | 8.57247 |
| C             | 2      | -0.69996 | 1.99940 | 4.69195 | 0.00861 | 6.69996 |
| H             | 3      | 0.25137  | 0.00000 | 0.74724 | 0.00139 | 0.74863 |
| H             | 4      | 0.24600  | 0.00000 | 0.75271 | 0.00130 | 0.75400 |
| H             | 5      | 0.24714  | 0.00000 | 0.75154 | 0.00132 | 0.75286 |
| C             | 6      | -0.01485 | 1.99903 | 3.99945 | 0.01637 | 6.01485 |
| C             | 7      | -0.25668 | 1.99896 | 4.24391 | 0.01382 | 6.25668 |
| H             | 8      | 0.24743  | 0.00000 | 0.75103 | 0.00154 | 0.75257 |
| C             | 9      | 0.00533  | 1.99896 | 3.97982 | 0.01590 | 5.99467 |
| C             | 10     | -0.09410 | 1.99891 | 4.07745 | 0.01774 | 6.09410 |
| C             | 11     | 0.06448  | 1.99898 | 3.91668 | 0.01986 | 5.93552 |
| C             | 12     | -0.06095 | 1.99891 | 4.04610 | 0.01594 | 6.06095 |
| C             | 13     | -0.15146 | 1.99899 | 4.13865 | 0.01383 | 6.15146 |
| H             | 14     | 0.26345  | 0.00000 | 0.73487 | 0.00168 | 0.73655 |
| C             | 15     | -0.04884 | 1.99902 | 4.03231 | 0.01751 | 6.04884 |
| C             | 16     | -0.02658 | 1.99898 | 4.01082 | 0.01679 | 6.02658 |
| C             | 17     | -0.07033 | 1.99894 | 4.04969 | 0.02170 | 6.07033 |
| C             | 18     | -0.19942 | 1.99881 | 4.18383 | 0.01678 | 6.19942 |
| C             | 19     | 0.48951  | 1.99842 | 3.48456 | 0.02752 | 5.51049 |
| C             | 20     | -0.39705 | 1.99887 | 4.38155 | 0.01662 | 6.39705 |
| C             | 21     | 0.47047  | 1.99844 | 3.50281 | 0.02828 | 5.52953 |
| C             | 22     | -0.06347 | 1.99899 | 4.04803 | 0.01645 | 6.06347 |
| C             | 23     | -0.21886 | 1.99903 | 4.20518 | 0.01465 | 6.21886 |
| H             | 24     | 0.25528  | 0.00000 | 0.74334 | 0.00139 | 0.74472 |
| C             | 25     | -0.26784 | 1.99912 | 4.25248 | 0.01623 | 6.26784 |
| H             | 26     | 0.25258  | 0.00000 | 0.74617 | 0.00126 | 0.74742 |
| C             | 27     | -0.24562 | 1.99912 | 4.23048 | 0.01602 | 6.24562 |
| H             | 28     | 0.25285  | 0.00000 | 0.74589 | 0.00127 | 0.74715 |

|   |    |          |         |         |         |         |
|---|----|----------|---------|---------|---------|---------|
| C | 29 | -0.24614 | 1.99903 | 4.23148 | 0.01562 | 6.24614 |
| H | 30 | 0.25349  | 0.00000 | 0.74486 | 0.00165 | 0.74651 |
| C | 31 | -0.03636 | 1.99901 | 4.02079 | 0.01656 | 6.03636 |
| C | 32 | -0.02977 | 1.99903 | 4.01335 | 0.01739 | 6.02977 |
| C | 33 | -0.09491 | 1.99897 | 4.07974 | 0.01620 | 6.09491 |
| C | 34 | -0.00340 | 1.99902 | 3.98951 | 0.01486 | 6.00340 |
| C | 35 | -0.06763 | 1.99902 | 4.05294 | 0.01567 | 6.06763 |
| C | 36 | -0.18206 | 1.99908 | 4.16789 | 0.01508 | 6.18206 |
| H | 37 | 0.25700  | 0.00000 | 0.74148 | 0.00152 | 0.74300 |
| C | 38 | -0.31826 | 1.99905 | 4.30478 | 0.01444 | 6.31826 |
| H | 39 | 0.26648  | 0.00000 | 0.73199 | 0.00153 | 0.73352 |
| C | 40 | 0.39070  | 1.99881 | 3.58743 | 0.02306 | 5.60930 |
| C | 41 | -0.09665 | 1.99927 | 4.08113 | 0.01625 | 6.09665 |
| H | 42 | 0.22336  | 0.00000 | 0.77419 | 0.00245 | 0.77664 |
| H | 43 | 0.22396  | 0.00000 | 0.77353 | 0.00250 | 0.77604 |
| C | 44 | -0.70493 | 1.99946 | 4.69650 | 0.00897 | 6.70493 |
| H | 45 | 0.24005  | 0.00000 | 0.75814 | 0.00181 | 0.75995 |
| H | 46 | 0.23813  | 0.00000 | 0.76001 | 0.00186 | 0.76187 |
| H | 47 | 0.24864  | 0.00000 | 0.75021 | 0.00115 | 0.75136 |
| C | 48 | -0.02017 | 1.99901 | 4.00563 | 0.01554 | 6.02017 |
| C | 49 | -0.23215 | 1.99908 | 4.21865 | 0.01442 | 6.23215 |
| H | 50 | 0.25347  | 0.00000 | 0.74503 | 0.00150 | 0.74653 |
| C | 51 | -0.22931 | 1.99911 | 4.21396 | 0.01623 | 6.22931 |
| H | 52 | 0.25745  | 0.00000 | 0.74128 | 0.00127 | 0.74255 |
| C | 53 | -0.25318 | 1.99910 | 4.23793 | 0.01615 | 6.25318 |
| H | 54 | 0.25786  | 0.00000 | 0.74089 | 0.00126 | 0.74214 |
| C | 55 | -0.20873 | 1.99907 | 4.19443 | 0.01523 | 6.20873 |
| H | 56 | 0.25685  | 0.00000 | 0.74169 | 0.00146 | 0.74315 |
| C | 57 | -0.07954 | 1.99902 | 4.06444 | 0.01608 | 6.07954 |
| C | 58 | -0.15410 | 1.99905 | 4.14106 | 0.01400 | 6.15410 |
| H | 59 | 0.26244  | 0.00000 | 0.73579 | 0.00177 | 0.73756 |
| C | 60 | -0.06683 | 1.99897 | 4.05160 | 0.01626 | 6.06683 |
| C | 61 | -0.70214 | 1.99940 | 4.69444 | 0.00830 | 6.70214 |
| H | 62 | 0.25156  | 0.00000 | 0.74698 | 0.00146 | 0.74844 |
| H | 63 | 0.25040  | 0.00000 | 0.74811 | 0.00149 | 0.74960 |
| H | 64 | 0.24703  | 0.00000 | 0.75173 | 0.00124 | 0.75297 |
| C | 65 | -0.25719 | 1.99896 | 4.24441 | 0.01382 | 6.25719 |
| H | 66 | 0.24761  | 0.00000 | 0.75086 | 0.00153 | 0.75239 |
| C | 67 | 0.00484  | 1.99895 | 3.98029 | 0.01591 | 5.99516 |
| C | 68 | -0.70186 | 1.99940 | 4.69414 | 0.00832 | 6.70186 |
| H | 69 | 0.24705  | 0.00000 | 0.75171 | 0.00124 | 0.75295 |
| H | 70 | 0.25003  | 0.00000 | 0.74846 | 0.00151 | 0.74997 |
| H | 71 | 0.25170  | 0.00000 | 0.74682 | 0.00148 | 0.74830 |
| C | 72 | -0.22075 | 1.99904 | 4.20630 | 0.01540 | 6.22075 |
| H | 73 | 0.26858  | 0.00000 | 0.72876 | 0.00266 | 0.73142 |
| C | 74 | 0.48955  | 1.99842 | 3.48433 | 0.02770 | 5.51045 |
| C | 75 | -0.39978 | 1.99887 | 4.38418 | 0.01672 | 6.39978 |
| F | 76 | -0.35706 | 1.99993 | 7.35070 | 0.00643 | 9.35706 |
| F | 77 | -0.35699 | 1.99993 | 7.35064 | 0.00642 | 9.35699 |
| F | 78 | -0.35649 | 1.99993 | 7.35012 | 0.00644 | 9.35649 |

|   |    |         |         |         |         |         |
|---|----|---------|---------|---------|---------|---------|
| H | 79 | 0.29018 | 0.00000 | 0.70817 | 0.00165 | 0.70982 |
| H | 80 | 0.29056 | 0.00000 | 0.70779 | 0.00165 | 0.70944 |

---

\* Total \*    0.00000    97.95460    237.22865    0.81675    336.00000

**Compound 3.**

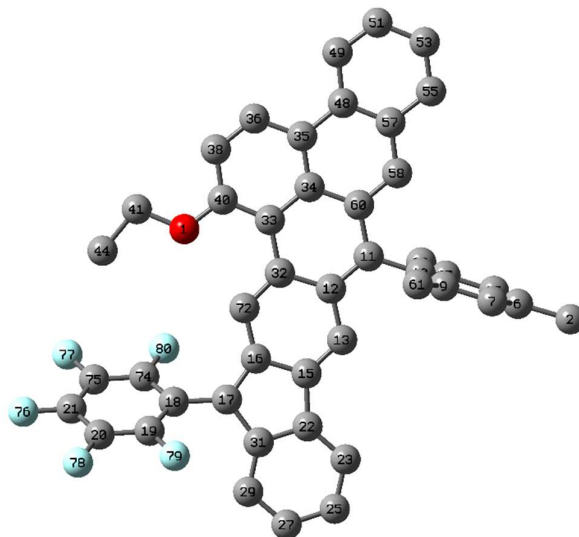

**Table S11.** Natural Population of **3** in DMF solvent

| Atom No | Natural Charge | Core     | Valence | Rydberg | Total   |         |
|---------|----------------|----------|---------|---------|---------|---------|
| O       | 1              | -0.57101 | 1.99971 | 6.55743 | 0.01388 | 8.57101 |
| C       | 2              | -0.69999 | 1.99940 | 4.69197 | 0.00862 | 6.69999 |
| H       | 3              | 0.25153  | 0.00000 | 0.74708 | 0.00139 | 0.74847 |
| H       | 4              | 0.24689  | 0.00000 | 0.75179 | 0.00132 | 0.75311 |
| H       | 5              | 0.24640  | 0.00000 | 0.75230 | 0.00131 | 0.75360 |
| C       | 6              | -0.01447 | 1.99903 | 3.99908 | 0.01637 | 6.01447 |
| C       | 7              | -0.25666 | 1.99896 | 4.24386 | 0.01383 | 6.25666 |
| H       | 8              | 0.24786  | 0.00000 | 0.75061 | 0.00153 | 0.75214 |
| C       | 9              | 0.00534  | 1.99895 | 3.97978 | 0.01592 | 5.99466 |
| C       | 10             | -0.09630 | 1.99891 | 4.07965 | 0.01774 | 6.09630 |
| C       | 11             | 0.07585  | 1.99899 | 3.90530 | 0.01986 | 5.92415 |
| C       | 12             | -0.06557 | 1.99891 | 4.05075 | 0.01590 | 6.06557 |
| C       | 13             | -0.14629 | 1.99899 | 4.13347 | 0.01384 | 6.14629 |
| H       | 14             | 0.26413  | 0.00000 | 0.73416 | 0.00171 | 0.73587 |
| C       | 15             | -0.05145 | 1.99902 | 4.03494 | 0.01750 | 6.05145 |
| C       | 16             | -0.01604 | 1.99899 | 4.00017 | 0.01688 | 6.01604 |
| C       | 17             | -0.08991 | 1.99894 | 4.06944 | 0.02153 | 6.08991 |
| C       | 18             | -0.15729 | 1.99887 | 4.14168 | 0.01675 | 6.15729 |
| C       | 19             | 0.40619  | 1.99837 | 3.56798 | 0.02746 | 5.59381 |
| C       | 20             | 0.32215  | 1.99833 | 3.65126 | 0.02826 | 5.67785 |
| C       | 21             | 0.34238  | 1.99837 | 3.63098 | 0.02827 | 5.65762 |
| C       | 22             | -0.06432 | 1.99899 | 4.04885 | 0.01648 | 6.06432 |
| C       | 23             | -0.21804 | 1.99903 | 4.20437 | 0.01464 | 6.21804 |

|   |    |          |         |         |         |         |
|---|----|----------|---------|---------|---------|---------|
| H | 24 | 0.25558  | 0.00000 | 0.74303 | 0.00139 | 0.74442 |
| C | 25 | -0.26821 | 1.99912 | 4.25286 | 0.01623 | 6.26821 |
| H | 26 | 0.25285  | 0.00000 | 0.74590 | 0.00125 | 0.74715 |
| C | 27 | -0.24465 | 1.99912 | 4.22948 | 0.01605 | 6.24465 |
| H | 28 | 0.25320  | 0.00000 | 0.74553 | 0.00127 | 0.74680 |
| C | 29 | -0.24782 | 1.99903 | 4.23319 | 0.01560 | 6.24782 |
| H | 30 | 0.25346  | 0.00000 | 0.74491 | 0.00163 | 0.74654 |
| C | 31 | -0.03539 | 1.99901 | 4.01989 | 0.01650 | 6.03539 |
| C | 32 | -0.02384 | 1.99904 | 4.00738 | 0.01741 | 6.02384 |
| C | 33 | -0.09753 | 1.99897 | 4.08241 | 0.01616 | 6.09753 |
| C | 34 | -0.00233 | 1.99902 | 3.98842 | 0.01488 | 6.00233 |
| C | 35 | -0.06821 | 1.99902 | 4.05355 | 0.01564 | 6.06821 |
| C | 36 | -0.17824 | 1.99908 | 4.16402 | 0.01513 | 6.17824 |
| H | 37 | 0.25748  | 0.00000 | 0.74099 | 0.00153 | 0.74252 |
| C | 38 | -0.31924 | 1.99905 | 4.30580 | 0.01440 | 6.31924 |
| H | 39 | 0.26700  | 0.00000 | 0.73144 | 0.00156 | 0.73300 |
| C | 40 | 0.39490  | 1.99882 | 3.58319 | 0.02310 | 5.60510 |
| C | 41 | -0.09707 | 1.99926 | 4.08146 | 0.01635 | 6.09707 |
| H | 42 | 0.22448  | 0.00000 | 0.77303 | 0.00249 | 0.77552 |
| H | 43 | 0.22397  | 0.00000 | 0.77357 | 0.00246 | 0.77603 |
| C | 44 | -0.70578 | 1.99945 | 4.69628 | 0.01004 | 6.70578 |
| H | 45 | 0.23755  | 0.00000 | 0.76066 | 0.00178 | 0.76245 |
| H | 46 | 0.23820  | 0.00000 | 0.75852 | 0.00328 | 0.76180 |
| H | 47 | 0.24904  | 0.00000 | 0.74979 | 0.00117 | 0.75096 |
| C | 48 | -0.01723 | 1.99901 | 4.00268 | 0.01554 | 6.01723 |
| C | 49 | -0.23255 | 1.99908 | 4.21905 | 0.01442 | 6.23255 |
| H | 50 | 0.25386  | 0.00000 | 0.74464 | 0.00150 | 0.74614 |
| C | 51 | -0.22665 | 1.99912 | 4.21131 | 0.01622 | 6.22665 |
| H | 52 | 0.25796  | 0.00000 | 0.74077 | 0.00127 | 0.74204 |
| C | 53 | -0.25308 | 1.99909 | 4.23783 | 0.01616 | 6.25308 |
| H | 54 | 0.25834  | 0.00000 | 0.74041 | 0.00125 | 0.74166 |
| C | 55 | -0.20659 | 1.99907 | 4.19228 | 0.01523 | 6.20659 |
| H | 56 | 0.25744  | 0.00000 | 0.74110 | 0.00146 | 0.74256 |
| C | 57 | -0.08128 | 1.99902 | 4.06619 | 0.01608 | 6.08128 |
| C | 58 | -0.14559 | 1.99905 | 4.13255 | 0.01399 | 6.14559 |
| H | 59 | 0.26355  | 0.00000 | 0.73466 | 0.00179 | 0.73645 |
| C | 60 | -0.07050 | 1.99897 | 4.05530 | 0.01623 | 6.07050 |
| C | 61 | -0.70213 | 1.99940 | 4.69440 | 0.00833 | 6.70213 |
| H | 62 | 0.25171  | 0.00000 | 0.74682 | 0.00147 | 0.74829 |
| H | 63 | 0.25030  | 0.00000 | 0.74820 | 0.00150 | 0.74970 |
| H | 64 | 0.24741  | 0.00000 | 0.75136 | 0.00123 | 0.75259 |
| C | 65 | -0.25635 | 1.99896 | 4.24357 | 0.01382 | 6.25635 |
| H | 66 | 0.24777  | 0.00000 | 0.75069 | 0.00153 | 0.75223 |
| C | 67 | 0.00567  | 1.99895 | 3.97946 | 0.01591 | 5.99433 |
| C | 68 | -0.70236 | 1.99940 | 4.69465 | 0.00831 | 6.70236 |
| H | 69 | 0.24743  | 0.00000 | 0.75134 | 0.00124 | 0.75257 |
| H | 70 | 0.25045  | 0.00000 | 0.74805 | 0.00149 | 0.74955 |
| H | 71 | 0.25180  | 0.00000 | 0.74674 | 0.00146 | 0.74820 |
| C | 72 | -0.22934 | 1.99905 | 4.21498 | 0.01531 | 6.22934 |
| H | 73 | 0.27066  | 0.00000 | 0.72668 | 0.00266 | 0.72934 |

|           |    |          |           |           |         |           |
|-----------|----|----------|-----------|-----------|---------|-----------|
| C         | 74 | 0.40856  | 1.99835   | 3.56575   | 0.02734 | 5.59144   |
| C         | 75 | 0.32074  | 1.99833   | 3.65256   | 0.02838 | 5.67926   |
| F         | 76 | -0.33502 | 1.99993   | 7.32730   | 0.00778 | 9.33502   |
| F         | 77 | -0.33886 | 1.99993   | 7.33121   | 0.00772 | 9.33886   |
| F         | 78 | -0.33909 | 1.99993   | 7.33147   | 0.00768 | 9.33909   |
| F         | 79 | -0.34445 | 1.99993   | 7.33740   | 0.00712 | 9.34445   |
| F         | 80 | -0.34336 | 1.99993   | 7.33628   | 0.00714 | 9.34336   |
| =====     |    |          |           |           |         |           |
| * Total * |    | 0.00000  | 101.95326 | 249.18990 | 0.85684 | 352.00000 |

### 3.2 TDDFT calculations *in vacuo*.

#### Optimized closed-shell structure of **1**

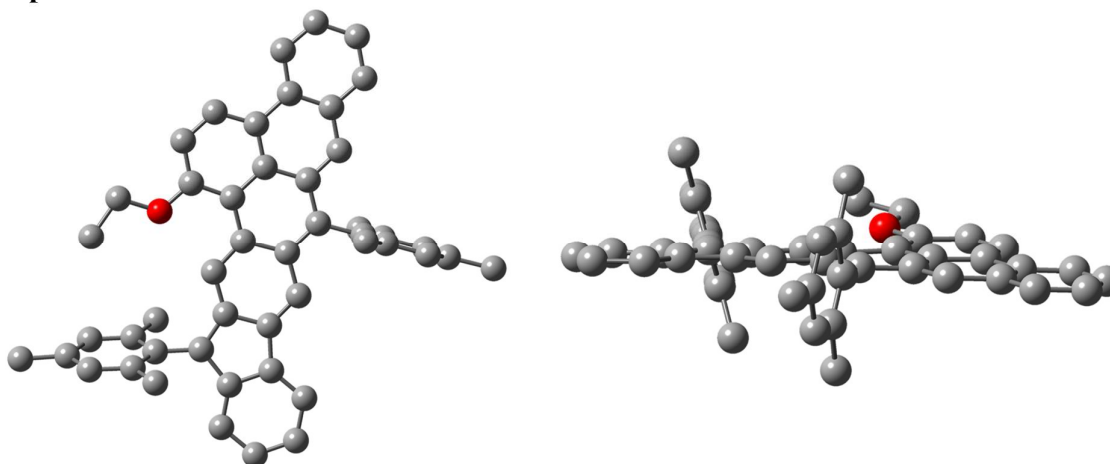

**Fig. S18.** Optimized structure of **1** top-view (left) and side-view (right).

**Table S12.** Summary of TDDFT calculation for **1**

| Wavelength (nm) | Oscillator Strength ( <i>f</i> ) | Major contribution                                |
|-----------------|----------------------------------|---------------------------------------------------|
| 651             | 0.4517                           | HOMO->LUMO (89%)                                  |
| 462             | 0.3058                           | H-1->LUMO (76%)                                   |
| 435             | 0.083                            | H-2->LUMO (47%), HOMO->L+1 (38%)                  |
| 423             | 0.1568                           | H-2->LUMO (35%), HOMO->L+1 (44%), HOMO->L+2 (13%) |
| 401             | 0.0385                           | H-3->LUMO (83%)                                   |
| 390             | 0.0074                           | H-6->LUMO (35%), H-4->LUMO (38%), HOMO->L+2 (15%) |
| 388             | 0.0013                           | H-6->LUMO (62%), H-4->LUMO (26%)                  |
| 377             | 0.0167                           | H-5->LUMO (82%)                                   |
| 370             | 0.1831                           | H-5->LUMO (14%), H-4->LUMO (14%), HOMO->L+2 (44%) |
| 368             | 0.0099                           | H-7->LUMO (95%)                                   |
| 330             | 0.0092                           | HOMO->L+3 (74%)                                   |
| 320             | 0.001                            | HOMO->L+4 (98%)                                   |

|     |        |                                                                 |
|-----|--------|-----------------------------------------------------------------|
| 317 | 0.0044 | H-8->LUMO (74%), HOMO->L+5 (13%)                                |
| 313 | 0.0313 | HOMO->L+5 (19%), HOMO->L+6 (73%)                                |
| 312 | 0.004  | H-8->LUMO (12%), HOMO->L+5 (57%), HOMO->L+6 (13%)               |
| 302 | 0.1323 | H-9->LUMO (53%), H-1->L+1 (22%)                                 |
| 301 | 0.0202 | HOMO->L+7 (87%)                                                 |
| 295 | 0.0214 | HOMO->L+8 (92%)                                                 |
| 293 | 0.1516 | H-9->LUMO (18%), H-2->L+1 (14%), H-1->L+1 (32%), H-1->L+2 (10%) |
| 291 | 0.0016 | H-10->LUMO (68%), H-1->L+2 (21%)                                |

### Optimized closed-shell structure of 2

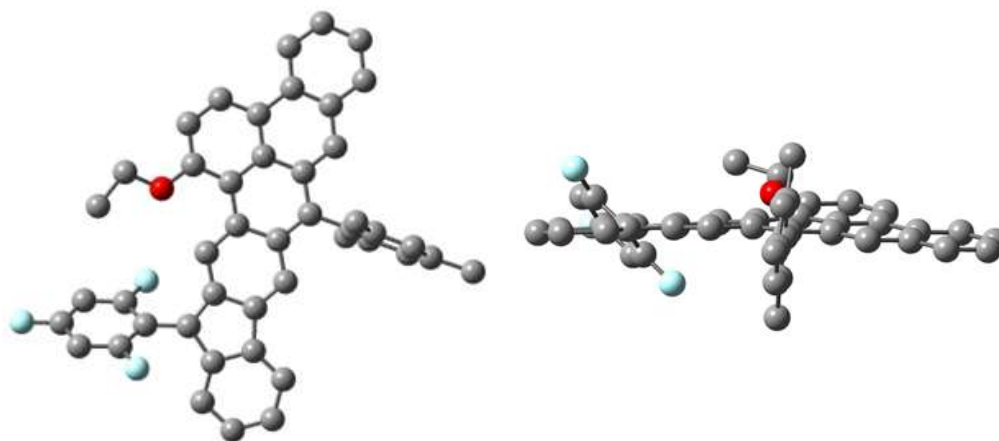

**Fig. S19.** Optimized structure of 2 top-view (left) and side-view (right).

**Table S13.** Summary of TTDFT calculation for 2

| Wavelength (nm) | Oscillator Strength ( <i>f</i> ) | Major contribution                                                 |
|-----------------|----------------------------------|--------------------------------------------------------------------|
| 671             | 0.4437                           | H-1->LUMO (10%), HOMO->LUMO (89%)                                  |
| 475             | 0.3835                           | H-1->LUMO (80%)                                                    |
| 442             | 0.0286                           | H-2->LUMO (76%), HOMO->L+1 (13%)                                   |
| 421             | 0.1253                           | H-2->LUMO (10%), HOMO->L+1 (66%), HOMO->L+2 (13%)                  |
| 401             | 0.0038                           | H-4->LUMO (85%), H-3->LUMO (10%)                                   |
| 398             | 0.0378                           | H-4->LUMO (14%), H-3->LUMO (56%), HOMO->L+1 (12%), HOMO->L+2 (13%) |
| 378             | 0.0008                           | H-5->LUMO (99%)                                                    |
| 372             | 0.207                            | H-3->LUMO (18%), HOMO->L+2 (63%)                                   |
| 348             | 0.0033                           | H-6->LUMO (66%), HOMO->L+3 (27%)                                   |
| 337             | 0.0837                           | H-8->LUMO (15%), H-6->LUMO (22%), HOMO->L+3 (49%)                  |
| 334             | 0.0144                           | HOMO->L+4 (86%)                                                    |
| 320             | 0.0735                           | H-8->LUMO (15%), HOMO->L+5 (67%)                                   |

|     |        |                                                                 |
|-----|--------|-----------------------------------------------------------------|
| 318 | 0.0137 | H-8->LUMO (16%), H-7->LUMO (63%)                                |
| 317 | 0.018  | H-8->LUMO (39%), H-7->LUMO (29%), HOMO->L+6 (11%)               |
| 315 | 0.0099 | HOMO->L+6 (79%)                                                 |
| 310 | 0.0095 | HOMO->L+7 (86%)                                                 |
| 302 | 0.1409 | H-9->LUMO (59%), H-1->L+1 (28%)                                 |
| 297 | 0.0037 | HOMO->L+8 (95%)                                                 |
| 294 | 0.022  | H-10->LUMO (73%), H-1->L+2 (16%)                                |
| 291 | 0.1193 | H-9->LUMO (19%), H-2->L+1 (17%), H-1->L+1 (23%), H-1->L+2 (13%) |

### Optimized closed-shell structure of **3**

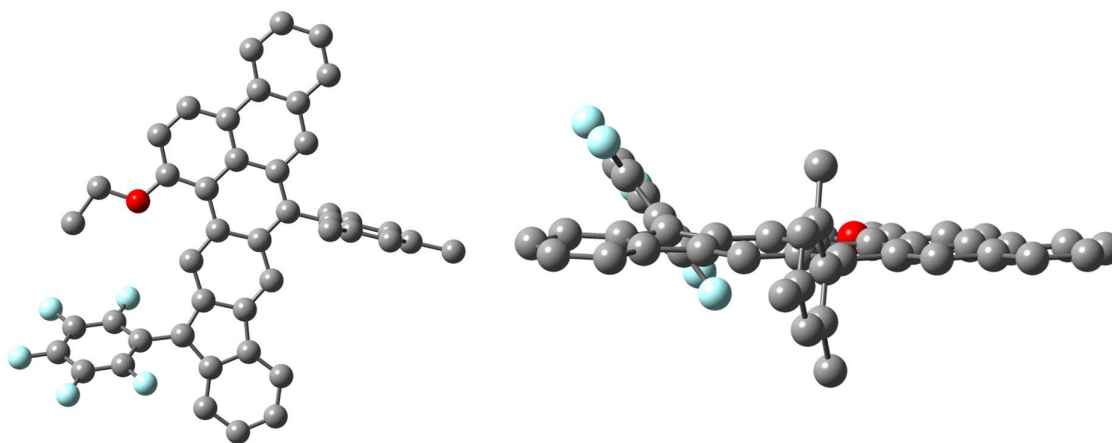

**Fig. S20.** Optimized structure of **3** top-view (left) and side-view (right).

**Table S14.** Summary of TTDFT calculation for **3**

| Wavelength (nm) | Oscillator Strength ( <i>f</i> ) | Major contribution                                |
|-----------------|----------------------------------|---------------------------------------------------|
| 671             | 0.4426                           | H-1->LUMO (10%), HOMO->LUMO (89%)                 |
| 479             | 0.4059                           | H-1->LUMO (80%)                                   |
| 445             | 0.0235                           | H-2->LUMO (82%)                                   |
| 417             | 0.1026                           | H-3->LUMO (11%), HOMO->L+1 (69%), HOMO->L+2 (11%) |
| 408             | 0.0001                           | H-4->LUMO (99%)                                   |
| 398             | 0.0693                           | H-3->LUMO (67%), HOMO->L+1 (17%)                  |
| 385             | 0.0003                           | H-5->LUMO (100%)                                  |
| 369             | 0.1941                           | H-3->LUMO (12%), HOMO->L+2 (70%)                  |
| 352             | 0.026                            | H-7->LUMO (15%), HOMO->L+3 (74%)                  |
| 342             | 0.0041                           | H-6->LUMO (91%)                                   |
| 337             | 0.0862                           | H-8->LUMO (14%), H-7->LUMO (69%), HOMO->L+3 (11%) |
| 323             | 0.0178                           | HOMO->L+4 (59%), HOMO->L+5 (25%)                  |
| 322             | 0.0415                           | H-8->LUMO (26%), HOMO->L+5 (53%)                  |

|     |        |                                                                 |
|-----|--------|-----------------------------------------------------------------|
| 316 | 0.041  | H-8->LUMO (47%), HOMO->L+4 (16%), HOMO->L+5 (12%)               |
| 312 | 0.0006 | HOMO->L+6 (99%)                                                 |
| 307 | 0.0051 | H-10->LUMO (11%), HOMO->L+7 (82%)                               |
| 302 | 0.1406 | H-9->LUMO (58%), H-1->L+1 (30%)                                 |
| 296 | 0.0262 | H-10->LUMO (72%)                                                |
| 293 | 0.0067 | HOMO->L+8 (93%)                                                 |
| 292 | 0.1176 | H-9->LUMO (19%), H-2->L+1 (17%), H-1->L+1 (21%), H-1->L+2 (19%) |

**Cartesian coordinates (in Angstroms) for the optimized structures:**

**Singlet closed-shell structure of 1:** Electronic energy = -1928.561632 Hartree

No. of Imaginary Frequency = Zero

Zero-point correction = 0.733808 (Hartree/Particle)

Thermal correction to Energy = 0.777130

Thermal correction to Enthalpy = 0.778074

Thermal correction to Gibbs Free Energy = 0.654587

Sum of electronic and zero-point Energies = -1927.827824

Sum of electronic and thermal Energies = -1927.784502

Sum of electronic and thermal Enthalpies = -1927.783558

Sum of electronic and thermal Free Energies = -1927.907045

| Atom | x           | y           | z           |
|------|-------------|-------------|-------------|
| O    | -1.17214000 | -3.21235700 | -0.37506100 |
| C    | 5.17142000  | 5.68818900  | -0.07641700 |
| H    | 6.24997100  | 5.48813400  | -0.04789000 |
| H    | 4.93448800  | 6.31151700  | 0.79089900  |
| H    | 4.97531800  | 6.27429000  | -0.97937300 |
| C    | 4.37662600  | 4.40365300  | -0.06765900 |
| C    | 4.06498100  | 3.74252500  | -1.25887600 |
| H    | 4.37909200  | 4.17623700  | -2.20582700 |
| C    | 3.35666300  | 2.53655500  | -1.27308700 |
| C    | 2.93890600  | 1.97152500  | -0.04901600 |
| C    | 2.17600200  | 0.67751800  | -0.04215700 |
| C    | 0.79489800  | 0.66686800  | -0.07799800 |
| C    | 0.08004800  | 1.93034700  | -0.09603800 |
| H    | 0.66702600  | 2.84148400  | -0.13421800 |
| C    | -1.27316200 | 1.97077200  | -0.04623500 |
| C    | -2.02957600 | 0.72887500  | 0.02152400  |
| C    | -3.38680000 | 1.01381000  | 0.07921700  |
| C    | -4.50195900 | 0.03741800  | 0.15813000  |
| C    | -5.29792000 | -0.22347100 | -0.98073800 |
| C    | -6.34051600 | -1.15071800 | -0.88905100 |
| H    | -6.94328400 | -1.35068900 | -1.77260300 |
| C    | -6.62614800 | -1.82783000 | 0.29977800  |
| C    | -7.78392800 | -2.79449600 | 0.38535300  |
| H    | -8.70904000 | -2.28159600 | 0.67754700  |

|   |             |             |             |
|---|-------------|-------------|-------------|
| H | -7.60031600 | -3.57681800 | 1.12820000  |
| H | -7.97384600 | -3.27881900 | -0.57742000 |
| C | -2.24269000 | 3.06743700  | -0.02913800 |
| C | -2.10149800 | 4.44960200  | -0.06474300 |
| H | -1.11772500 | 4.90793200  | -0.12342100 |
| C | -3.25104000 | 5.24933400  | -0.02183400 |
| H | -3.15583000 | 6.33074000  | -0.04970000 |
| C | -4.52100000 | 4.66613500  | 0.06032000  |
| H | -5.40044000 | 5.30300800  | 0.09706300  |
| C | -4.67467100 | 3.27667100  | 0.09917500  |
| H | -5.66271600 | 2.83085600  | 0.17133000  |
| C | -3.53460500 | 2.46980500  | 0.04890700  |
| C | 0.03552100  | -0.59456400 | -0.06842700 |
| C | 0.79113000  | -1.86495300 | -0.11234400 |
| C | 2.22150700  | -1.83464400 | -0.03322000 |
| C | 3.00142200  | -3.03433900 | -0.01584800 |
| C | 2.32555300  | -4.26092400 | -0.10903000 |
| H | 2.87533600  | -5.19383400 | -0.09920100 |
| C | 0.95362700  | -4.31447200 | -0.22824700 |
| H | 0.47305300  | -5.28003900 | -0.31107100 |
| C | 0.18156500  | -3.14376900 | -0.23811300 |
| C | -1.81951200 | -4.47142900 | -0.58239200 |
| H | -1.64677600 | -5.12584600 | 0.28267700  |
| H | -1.39797400 | -4.96227200 | -1.46966800 |
| C | -3.30169800 | -4.19762300 | -0.76627100 |
| H | -3.47180300 | -3.54401000 | -1.62560000 |
| H | -3.72669000 | -3.71509200 | 0.11768100  |
| H | -3.83284400 | -5.13938900 | -0.93595700 |
| C | 4.45395100  | -2.98498300 | 0.09252200  |
| C | 5.27329800  | -4.13600400 | 0.14144900  |
| H | 4.83025800  | -5.12436100 | 0.10163700  |
| C | 6.64987500  | -4.03762700 | 0.24520200  |
| H | 7.25033100  | -4.94182800 | 0.28205500  |
| C | 7.27586800  | -2.77735700 | 0.30394300  |
| H | 8.35645800  | -2.70854800 | 0.38484900  |
| C | 6.50459800  | -1.63542300 | 0.25856100  |
| H | 6.96752800  | -0.65319500 | 0.30310300  |
| C | 5.09286000  | -1.71413000 | 0.15377800  |
| C | 4.30009000  | -0.53888900 | 0.10363000  |
| H | 4.80700600  | 0.41923000  | 0.13675700  |
| C | 2.91973400  | -0.56254300 | 0.01513700  |
| C | 3.03872700  | 1.86591400  | -2.59019800 |
| H | 1.95805600  | 1.79481700  | -2.75407700 |
| H | 3.43193000  | 0.84440700  | -2.62479600 |
| H | 3.47054000  | 2.42319200  | -3.42554000 |
| C | 3.95262200  | 3.82729200  | 1.13253000  |
| H | 4.17864000  | 4.32758900  | 2.07171300  |
| C | 3.24075700  | 2.62332900  | 1.16559600  |
| C | 2.79670800  | 2.04813600  | 2.49139300  |
| H | 3.17221200  | 2.65064000  | 3.32255600  |
| H | 3.15733100  | 1.02289400  | 2.62552800  |

|   |             |             |             |
|---|-------------|-------------|-------------|
| H | 1.70451500  | 2.01251700  | 2.56714600  |
| C | -1.34378500 | -0.51710200 | -0.00202800 |
| H | -1.93792700 | -1.41321800 | 0.02848300  |
| C | -4.77395100 | -0.63970600 | 1.36841900  |
| C | -5.82735900 | -1.55953800 | 1.41480900  |
| H | -6.03440800 | -2.07171800 | 2.35229300  |
| C | -3.95537600 | -0.37750500 | 2.61267700  |
| H | -3.88101200 | 0.69425700  | 2.82256200  |
| H | -2.93017300 | -0.74903200 | 2.50968200  |
| H | -4.40370500 | -0.86571700 | 3.48240800  |
| C | -5.01763200 | 0.46307200  | -2.29819000 |
| H | -5.67771900 | 0.08518000  | -3.08368400 |
| H | -3.98157400 | 0.30498300  | -2.61587000 |
| H | -5.16096400 | 1.54651300  | -2.22829600 |

**Singlet open-shell structure of 1:** Electronic energy = -1928.561632 Hartree

No. of Imaginary Frequency = Zero

Zero-point correction = 0.733808 (Hartree/Particle)

Thermal correction to Energy = 0.777130

Thermal correction to Enthalpy = 0.778074

Thermal correction to Gibbs Free Energy = 0.654587

Sum of electronic and zero-point Energies = -1927.827824

Sum of electronic and thermal Energies = -1927.784502

Sum of electronic and thermal Enthalpies = -1927.783558

Sum of electronic and thermal Free Energies = -1927.907045

| Atom | x           | y           | z           |
|------|-------------|-------------|-------------|
| O    | -1.17214000 | -3.21235700 | -0.37506100 |
| C    | 5.17142000  | 5.68818900  | -0.07641700 |
| H    | 6.24997100  | 5.48813400  | -0.04789000 |
| H    | 4.93448800  | 6.31151700  | 0.79089900  |
| H    | 4.97531800  | 6.27429000  | -0.97937300 |
| C    | 4.37662600  | 4.40365300  | -0.06765900 |
| C    | 4.06498100  | 3.74252500  | -1.25887600 |
| H    | 4.37909200  | 4.17623700  | -2.20582700 |
| C    | 3.35666300  | 2.53655500  | -1.27308700 |
| C    | 2.93890600  | 1.97152500  | -0.04901600 |
| C    | 2.17600200  | 0.67751800  | -0.04215700 |
| C    | 0.79489800  | 0.66686800  | -0.07799800 |
| C    | 0.08004800  | 1.93034700  | -0.09603800 |
| H    | 0.66702600  | 2.84148400  | -0.13421800 |
| C    | -1.27316200 | 1.97077200  | -0.04623500 |
| C    | -2.02957600 | 0.72887500  | 0.02152400  |
| C    | -3.38680000 | 1.01381000  | 0.07921700  |
| C    | -4.50195900 | 0.03741800  | 0.15813000  |
| C    | -5.29792000 | -0.22347100 | -0.98073800 |
| C    | -6.34051600 | -1.15071800 | -0.88905100 |
| H    | -6.94328400 | -1.35068900 | -1.77260300 |
| C    | -6.62614800 | -1.82783000 | 0.29977800  |

|   |             |             |             |
|---|-------------|-------------|-------------|
| C | -7.78392800 | -2.79449600 | 0.38535300  |
| H | -8.70904000 | -2.28159600 | 0.67754700  |
| H | -7.60031600 | -3.57681800 | 1.12820000  |
| H | -7.97384600 | -3.27881900 | -0.57742000 |
| C | -2.24269000 | 3.06743700  | -0.02913800 |
| C | -2.10149800 | 4.44960200  | -0.06474300 |
| H | -1.11772500 | 4.90793200  | -0.12342100 |
| C | -3.25104000 | 5.24933400  | -0.02183400 |
| H | -3.15583000 | 6.33074000  | -0.04970000 |
| C | -4.52100000 | 4.66613500  | 0.06032000  |
| H | -5.40044000 | 5.30300800  | 0.09706300  |
| C | -4.67467100 | 3.27667100  | 0.09917500  |
| H | -5.66271600 | 2.83085600  | 0.17133000  |
| C | -3.53460500 | 2.46980500  | 0.04890700  |
| C | 0.03552100  | -0.59456400 | -0.06842700 |
| C | 0.79113000  | -1.86495300 | -0.11234400 |
| C | 2.22150700  | -1.83464400 | -0.03322000 |
| C | 3.00142200  | -3.03433900 | -0.01584800 |
| C | 2.32555300  | -4.26092400 | -0.10903000 |
| H | 2.87533600  | -5.19383400 | -0.09920100 |
| C | 0.95362700  | -4.31447200 | -0.22824700 |
| H | 0.47305300  | -5.28003900 | -0.31107100 |
| C | 0.18156500  | -3.14376900 | -0.23811300 |
| C | -1.81951200 | -4.47142900 | -0.58239200 |
| H | -1.64677600 | -5.12584600 | 0.28267700  |
| H | -1.39797400 | -4.96227200 | -1.46966800 |
| C | -3.30169800 | -4.19762300 | -0.76627100 |
| H | -3.47180300 | -3.54401000 | -1.62560000 |
| H | -3.72669000 | -3.71509200 | 0.11768100  |
| H | -3.83284400 | -5.13938900 | -0.93595700 |
| C | 4.45395100  | -2.98498300 | 0.09252200  |
| C | 5.27329800  | -4.13600400 | 0.14144900  |
| H | 4.83025800  | -5.12436100 | 0.10163700  |
| C | 6.64987500  | -4.03762700 | 0.24520200  |
| H | 7.25033100  | -4.94182800 | 0.28205500  |
| C | 7.27586800  | -2.77735700 | 0.30394300  |
| H | 8.35645800  | -2.70854800 | 0.38484900  |
| C | 6.50459800  | -1.63542300 | 0.25856100  |
| H | 6.96752800  | -0.65319500 | 0.30310300  |
| C | 5.09286000  | -1.71413000 | 0.15377800  |
| C | 4.30009000  | -0.53888900 | 0.10363000  |
| H | 4.80700600  | 0.41923000  | 0.13675700  |
| C | 2.91973400  | -0.56254300 | 0.01513700  |
| C | 3.03872700  | 1.86591400  | -2.59019800 |
| H | 1.95805600  | 1.79481700  | -2.75407700 |
| H | 3.43193000  | 0.84440700  | -2.62479600 |
| H | 3.47054000  | 2.42319200  | -3.42554000 |
| C | 3.95262200  | 3.82729200  | 1.13253000  |
| H | 4.17864000  | 4.32758900  | 2.07171300  |
| C | 3.24075700  | 2.62332900  | 1.16559600  |
| C | 2.79670800  | 2.04813600  | 2.49139300  |

|   |             |             |             |
|---|-------------|-------------|-------------|
| H | 3.17221200  | 2.65064000  | 3.32255600  |
| H | 3.15733100  | 1.02289400  | 2.62552800  |
| H | 1.70451500  | 2.01251700  | 2.56714600  |
| C | -1.34378500 | -0.51710200 | -0.00202800 |
| H | -1.93792700 | -1.41321800 | 0.02848300  |
| C | -4.77395100 | -0.63970600 | 1.36841900  |
| C | -5.82735900 | -1.55953800 | 1.41480900  |
| H | -6.03440800 | -2.07171800 | 2.35229300  |
| C | -3.95537600 | -0.37750500 | 2.61267700  |
| H | -3.88101200 | 0.69425700  | 2.82256200  |
| H | -2.93017300 | -0.74903200 | 2.50968200  |
| H | -4.40370500 | -0.86571700 | 3.48240800  |
| C | -5.01763200 | 0.46307200  | -2.29819000 |
| H | -5.67771900 | 0.08518000  | -3.08368400 |
| H | -3.98157400 | 0.30498300  | -2.61587000 |
| H | -5.16096400 | 1.54651300  | -2.22829600 |

**Triplet open-shell structure of 1:** Electronic energy = -1928.540278 Hartree  
 No. of Imaginary Frequency = Zero

Zero-point correction = 0.731713 (Hartree/Particle)

Thermal correction to Energy = 0.775182

Thermal correction to Enthalpy = 0.776127

Thermal correction to Gibbs Free Energy = 0.651510

Sum of electronic and zero-point Energies = -1927.808564

Sum of electronic and thermal Energies = -1927.765096

Sum of electronic and thermal Enthalpies = -1927.764151

Sum of electronic and thermal Free Energies = -1927.888768

| Atom | x           | y           | z           |
|------|-------------|-------------|-------------|
| O    | -1.17574900 | -3.17355600 | -0.43247300 |
| C    | 5.12679400  | 5.73303600  | -0.12577100 |
| H    | 6.20954300  | 5.55586500  | -0.10358600 |
| H    | 4.88320800  | 6.35567800  | 0.74037500  |
| H    | 4.91250700  | 6.31086600  | -1.02998800 |
| C    | 4.35888000  | 4.43228300  | -0.10537500 |
| C    | 4.03477900  | 3.76920700  | -1.29208900 |
| H    | 4.31928900  | 4.21268700  | -2.24399800 |
| C    | 3.35112200  | 2.54886600  | -1.29476800 |
| C    | 2.97288100  | 1.96844700  | -0.06509300 |
| C    | 2.22744400  | 0.66709600  | -0.04827300 |
| C    | 0.79548700  | 0.66869900  | -0.06733000 |
| C    | 0.09781700  | 1.91349300  | -0.06494500 |
| H    | 0.67882700  | 2.82849800  | -0.09287800 |
| C    | -1.27526100 | 1.95151400  | -0.01294500 |
| C    | -2.00840200 | 0.72641200  | 0.04979900  |
| C    | -3.43287700 | 1.02993200  | 0.11236500  |
| C    | -4.53400800 | 0.04272700  | 0.17625900  |
| C    | -5.32920800 | -0.21047100 | -0.96518400 |
| C    | -6.35514100 | -1.15727000 | -0.88535000 |

|   |             |             |             |
|---|-------------|-------------|-------------|
| H | -6.95703400 | -1.35279000 | -1.77034000 |
| C | -6.62429100 | -1.86062400 | 0.29187800  |
| C | -7.76421000 | -2.84905400 | 0.36416700  |
| H | -8.69312400 | -2.36034100 | 0.68422100  |
| H | -7.55727800 | -3.64948200 | 1.08107500  |
| H | -7.95944800 | -3.30776200 | -0.60986100 |
| C | -2.24573100 | 3.04364700  | 0.00783300  |
| C | -2.09941000 | 4.42604900  | -0.02492100 |
| H | -1.11354700 | 4.87947900  | -0.08074300 |
| C | -3.24340400 | 5.23229500  | 0.01612300  |
| H | -3.13866000 | 6.31296200  | -0.01000900 |
| C | -4.52716200 | 4.66300300  | 0.09475900  |
| H | -5.39729700 | 5.31203200  | 0.13041200  |
| C | -4.69375000 | 3.28268600  | 0.13132200  |
| H | -5.68479700 | 2.84347700  | 0.20171900  |
| C | -3.55447400 | 2.45511300  | 0.08213100  |
| C | 0.06329200  | -0.56985300 | -0.06284900 |
| C | 0.79848300  | -1.83733200 | -0.10998000 |
| C | 2.23095100  | -1.81859600 | -0.02575300 |
| C | 2.99766500  | -3.02782800 | 0.00650500  |
| C | 2.30924700  | -4.24304200 | -0.07516100 |
| H | 2.84859400  | -5.18184200 | -0.05106700 |
| C | 0.93256200  | -4.28934600 | -0.21232800 |
| H | 0.44947800  | -5.25336900 | -0.29714700 |
| C | 0.17385900  | -3.11931000 | -0.24759900 |
| C | -1.82510400 | -4.42972400 | -0.64827300 |
| H | -1.68465700 | -5.07728700 | 0.22780800  |
| H | -1.37759700 | -4.93160500 | -1.51647200 |
| C | -3.29860100 | -4.14855500 | -0.88341400 |
| H | -3.43534000 | -3.49912600 | -1.75191600 |
| H | -3.75128500 | -3.65955800 | -0.01685000 |
| H | -3.82884700 | -5.08833200 | -1.06649300 |
| C | 4.45574100  | -2.99831000 | 0.11479300  |
| C | 5.25424300  | -4.15838600 | 0.18346600  |
| H | 4.79476400  | -5.14008300 | 0.16423500  |
| C | 6.63569100  | -4.08473500 | 0.28123400  |
| H | 7.21956200  | -4.99881800 | 0.33351800  |
| C | 7.28214300  | -2.83371800 | 0.31357500  |
| H | 8.36424100  | -2.78152300 | 0.38937000  |
| C | 6.53197300  | -1.67936200 | 0.25007600  |
| H | 7.01288700  | -0.70514800 | 0.27563900  |
| C | 5.11425300  | -1.73113100 | 0.15172400  |
| C | 4.34791900  | -0.55068400 | 0.09011200  |
| H | 4.86457700  | 0.40224600  | 0.11078500  |
| C | 2.93675400  | -0.54924100 | 0.00982300  |
| C | 3.02357900  | 1.87083300  | -2.60554600 |
| H | 1.94477300  | 1.72035600  | -2.72058500 |
| H | 3.48983600  | 0.88184900  | -2.67075200 |
| H | 3.37466300  | 2.46682600  | -3.45216900 |
| C | 3.97335300  | 3.84285600  | 1.10162900  |
| H | 4.20943400  | 4.34452700  | 2.03775600  |

|   |             |             |             |
|---|-------------|-------------|-------------|
| C | 3.28788000  | 2.62408900  | 1.14452000  |
| C | 2.89167200  | 2.02856500  | 2.47622400  |
| H | 3.20205800  | 2.67538800  | 3.30114600  |
| H | 3.34942500  | 1.04479600  | 2.62650600  |
| H | 1.80771300  | 1.88748600  | 2.54518100  |
| C | -1.35696700 | -0.49407400 | 0.01942400  |
| H | -1.94097300 | -1.39656800 | 0.06157100  |
| C | -4.78827200 | -0.66195600 | 1.37560600  |
| C | -5.82573100 | -1.59917800 | 1.40919800  |
| H | -6.02054700 | -2.13111500 | 2.33814900  |
| C | -3.97605300 | -0.39600200 | 2.62289600  |
| H | -3.99247600 | 0.66652000  | 2.88798700  |
| H | -2.92445900 | -0.66996200 | 2.48937900  |
| H | -4.36782400 | -0.96315800 | 3.47148100  |
| C | -5.06767000 | 0.50316300  | -2.27246000 |
| H | -5.69899000 | 0.09995600  | -3.06881400 |
| H | -4.02205900 | 0.40031200  | -2.58105500 |
| H | -5.26757300 | 1.57712700  | -2.19601200 |

**Singlet closed-shell structure of 2:** Electronic energy = -2108.296224 Hartree

No. of Imaginary Frequency = Zero

Zero-point correction = 0.626697 (Hartree/Particle)

Thermal correction to Energy = 0.667144

Thermal correction to Enthalpy = 0.668088

Thermal correction to Gibbs Free Energy = 0.552054

Sum of electronic and zero-point Energies = -2107.669527

Sum of electronic and thermal Energies = -2107.629080

Sum of electronic and thermal Enthalpies = -2107.628136

Sum of electronic and thermal Free Energies = -2107.744171

| Atom | x           | y           | z           |
|------|-------------|-------------|-------------|
| O    | -1.09637100 | -3.20019600 | -0.66039400 |
| C    | 5.07761600  | 5.76557700  | -0.07954800 |
| H    | 6.15737700  | 5.58296500  | -0.00978100 |
| H    | 4.80094000  | 6.39974900  | 0.76790600  |
| H    | 4.90452100  | 6.33294600  | -0.99897800 |
| C    | 4.30271400  | 4.46900100  | -0.07597500 |
| C    | 4.03930000  | 3.78529400  | -1.26608300 |
| H    | 4.37653700  | 4.20963400  | -2.20927000 |
| C    | 3.35090300  | 2.56795000  | -1.28393400 |
| C    | 2.90292600  | 2.01553700  | -0.06479800 |
| C    | 2.16209800  | 0.70929400  | -0.06313100 |
| C    | 0.78159200  | 0.67486400  | -0.13030800 |
| C    | 0.04033500  | 1.91918600  | -0.16533900 |
| H    | 0.60349000  | 2.84383500  | -0.22899700 |
| C    | -1.31326100 | 1.92823500  | -0.08973800 |
| C    | -2.04367600 | 0.67537100  | 0.03146400  |
| C    | -3.40608900 | 0.95058100  | 0.11469100  |
| C    | -4.49068100 | -0.02778900 | 0.26807200  |
| C    | -5.63263500 | -0.03377700 | -0.55151400 |

|   |             |             |             |
|---|-------------|-------------|-------------|
| C | -6.68103100 | -0.93657800 | -0.42725100 |
| C | -6.58377000 | -1.89680800 | 0.57151800  |
| C | -2.29632700 | 3.00994500  | -0.08019500 |
| C | -2.16142800 | 4.39219400  | -0.14896100 |
| H | -1.18059600 | 4.85107600  | -0.24134900 |
| C | -3.31114300 | 5.18772100  | -0.09337400 |
| H | -3.22304600 | 6.26872000  | -0.14665000 |
| C | -4.57409100 | 4.59807500  | 0.03517200  |
| H | -5.45696900 | 5.22941000  | 0.08126900  |
| C | -4.71990700 | 3.20999200  | 0.10518000  |
| H | -5.70747600 | 2.77251200  | 0.20451200  |
| C | -3.57909300 | 2.40477500  | 0.04249300  |
| C | 0.04660500  | -0.59779500 | -0.11653800 |
| C | 0.82432700  | -1.85071400 | -0.19235700 |
| C | 2.24807700  | -1.80093000 | -0.05455300 |
| C | 3.04338700  | -2.98927800 | -0.02774300 |
| C | 2.39066700  | -4.22158200 | -0.19078700 |
| H | 2.95226000  | -5.14743900 | -0.17404600 |
| C | 1.02927000  | -4.28858700 | -0.39884900 |
| H | 0.56848200  | -5.25680800 | -0.54309100 |
| C | 0.24247800  | -3.12742300 | -0.41616900 |
| C | -1.68802500 | -4.44065700 | -1.05884700 |
| H | -1.61876600 | -5.16847000 | -0.23908300 |
| H | -1.14574700 | -4.84785100 | -1.92225000 |
| C | -3.13816000 | -4.16303500 | -1.41264100 |
| H | -3.20400000 | -3.43437200 | -2.22482900 |
| H | -3.68403700 | -3.77006000 | -0.55068600 |
| H | -3.62440100 | -5.08870800 | -1.73544200 |
| C | 4.48702000  | -2.91959500 | 0.15710500  |
| C | 5.31989900  | -4.05879900 | 0.23913500  |
| H | 4.89385200  | -5.05302400 | 0.17075400  |
| C | 6.68757700  | -3.94072600 | 0.41494800  |
| H | 7.29888300  | -4.83622000 | 0.47679200  |
| C | 7.29089400  | -2.67197600 | 0.51532700  |
| H | 8.36469500  | -2.58825200 | 0.65233400  |
| C | 6.50599300  | -1.54109100 | 0.43962100  |
| H | 6.95124000  | -0.55269600 | 0.51590700  |
| C | 5.10265500  | -1.63959400 | 0.26270700  |
| C | 4.29700000  | -0.47487400 | 0.18044900  |
| H | 4.78836200  | 0.49029400  | 0.23772500  |
| C | 2.92218900  | -0.51835900 | 0.03158700  |
| C | 3.08659900  | 1.87182700  | -2.59974600 |
| H | 2.01314300  | 1.76939700  | -2.79178900 |
| H | 3.50790400  | 0.86094100  | -2.60997700 |
| H | 3.52609400  | 2.42944200  | -3.43078300 |
| C | 3.84941800  | 3.90437300  | 1.11909200  |
| H | 4.03780200  | 4.42234300  | 2.05695900  |
| C | 3.15495400  | 2.69026400  | 1.14878400  |
| C | 2.67762200  | 2.12855800  | 2.46885400  |
| H | 3.01969300  | 2.74807800  | 3.30187300  |
| H | 3.04681700  | 1.11024200  | 2.62974300  |

|   |             |             |             |
|---|-------------|-------------|-------------|
| H | 1.58419200  | 2.07991700  | 2.51191500  |
| C | -1.33047800 | -0.55443100 | -0.00046700 |
| H | -1.88914100 | -1.47081800 | 0.06737900  |
| C | -4.47867100 | -1.03068300 | 1.25362500  |
| C | -5.49050700 | -1.96796700 | 1.42604100  |
| F | -7.58152500 | -2.78857900 | 0.71655500  |
| F | -5.71775200 | 0.88162200  | -1.53520800 |
| F | -3.43371300 | -1.09010500 | 2.09920600  |
| H | -7.53168100 | -0.89639500 | -1.09551300 |
| H | -5.43341000 | -2.70865600 | 2.21352400  |

**Singlet open-shell structure of 2:** Electronic energy = -2108.296224 Hartree

No. of Imaginary Frequency = Zero

Zero-point correction = 0.626697 (Hartree/Particle)

Thermal correction to Energy = 0.667144

Thermal correction to Enthalpy = 0.668088

Thermal correction to Gibbs Free Energy = 0.552054

Sum of electronic and zero-point Energies = -2107.669527

Sum of electronic and thermal Energies = -2107.629080

Sum of electronic and thermal Enthalpies = -2107.628136

Sum of electronic and thermal Free Energies = -2107.744171

| Atom | x           | y           | z           |
|------|-------------|-------------|-------------|
| O    | -1.09637100 | -3.20019600 | -0.66039400 |
| C    | 5.07761600  | 5.76557700  | -0.07954800 |
| H    | 6.15737700  | 5.58296500  | -0.00978100 |
| H    | 4.80094000  | 6.39974900  | 0.76790600  |
| H    | 4.90452100  | 6.33294600  | -0.99897800 |
| C    | 4.30271400  | 4.46900100  | -0.07597500 |
| C    | 4.03930000  | 3.78529400  | -1.26608300 |
| H    | 4.37653700  | 4.20963400  | -2.20927000 |
| C    | 3.35090300  | 2.56795000  | -1.28393400 |
| C    | 2.90292600  | 2.01553700  | -0.06479800 |
| C    | 2.16209800  | 0.70929400  | -0.06313100 |
| C    | 0.78159200  | 0.67486400  | -0.13030800 |
| C    | 0.04033500  | 1.91918600  | -0.16533900 |
| H    | 0.60349000  | 2.84383500  | -0.22899700 |
| C    | -1.31326100 | 1.92823500  | -0.08973800 |
| C    | -2.04367600 | 0.67537100  | 0.03146400  |
| C    | -3.40608900 | 0.95058100  | 0.11469100  |
| C    | -4.49068100 | -0.02778900 | 0.26807200  |
| C    | -5.63263500 | -0.03377700 | -0.55151400 |
| C    | -6.68103100 | -0.93657800 | -0.42725100 |
| C    | -6.58377000 | -1.89680800 | 0.57151800  |
| C    | -2.29632700 | 3.00994500  | -0.08019500 |
| C    | -2.16142800 | 4.39219400  | -0.14896100 |
| H    | -1.18059600 | 4.85107600  | -0.24134900 |
| C    | -3.31114300 | 5.18772100  | -0.09337400 |
| H    | -3.22304600 | 6.26872000  | -0.14665000 |

|   |             |             |             |
|---|-------------|-------------|-------------|
| C | -4.57409100 | 4.59807500  | 0.03517200  |
| H | -5.45696900 | 5.22941000  | 0.08126900  |
| C | -4.71990700 | 3.20999200  | 0.10518000  |
| H | -5.70747600 | 2.77251200  | 0.20451200  |
| C | -3.57909300 | 2.40477500  | 0.04249300  |
| C | 0.04660500  | -0.59779500 | -0.11653800 |
| C | 0.82432700  | -1.85071400 | -0.19235700 |
| C | 2.24807700  | -1.80093000 | -0.05455300 |
| C | 3.04338700  | -2.98927800 | -0.02774300 |
| C | 2.39066700  | -4.22158200 | -0.19078700 |
| H | 2.95226000  | -5.14743900 | -0.17404600 |
| C | 1.02927000  | -4.28858700 | -0.39884900 |
| H | 0.56848200  | -5.25680800 | -0.54309100 |
| C | 0.24247800  | -3.12742300 | -0.41616900 |
| C | -1.68802500 | -4.44065700 | -1.05884700 |
| H | -1.61876600 | -5.16847000 | -0.23908300 |
| H | -1.14574700 | -4.84785100 | -1.92225000 |
| C | -3.13816000 | -4.16303500 | -1.41264100 |
| H | -3.20400000 | -3.43437200 | -2.22482900 |
| H | -3.68403700 | -3.77006000 | -0.55068600 |
| H | -3.62440100 | -5.08870800 | -1.73544200 |
| C | 4.48702000  | -2.91959500 | 0.15710500  |
| C | 5.31989900  | -4.05879900 | 0.23913500  |
| H | 4.89385200  | -5.05302400 | 0.17075400  |
| C | 6.68757700  | -3.94072600 | 0.41494800  |
| H | 7.29888300  | -4.83622000 | 0.47679200  |
| C | 7.29089400  | -2.67197600 | 0.51532700  |
| H | 8.36469500  | -2.58825200 | 0.65233400  |
| C | 6.50599300  | -1.54109100 | 0.43962100  |
| H | 6.95124000  | -0.55269600 | 0.51590700  |
| C | 5.10265500  | -1.63959400 | 0.26270700  |
| C | 4.29700000  | -0.47487400 | 0.18044900  |
| H | 4.78836200  | 0.49029400  | 0.23772500  |
| C | 2.92218900  | -0.51835900 | 0.03158700  |
| C | 3.08659900  | 1.87182700  | -2.59974600 |
| H | 2.01314300  | 1.76939700  | -2.79178900 |
| H | 3.50790400  | 0.86094100  | -2.60997700 |
| H | 3.52609400  | 2.42944200  | -3.43078300 |
| C | 3.84941800  | 3.90437300  | 1.11909200  |
| H | 4.03780200  | 4.42234300  | 2.05695900  |
| C | 3.15495400  | 2.69026400  | 1.14878400  |
| C | 2.67762200  | 2.12855800  | 2.46885400  |
| H | 3.01969300  | 2.74807800  | 3.30187300  |
| H | 3.04681700  | 1.11024200  | 2.62974300  |
| H | 1.58419200  | 2.07991700  | 2.51191500  |
| C | -1.33047800 | -0.55443100 | -0.00046700 |
| H | -1.88914100 | -1.47081800 | 0.06737900  |
| C | -4.47867100 | -1.03068300 | 1.25362500  |
| C | -5.49050700 | -1.96796700 | 1.42604100  |
| F | -7.58152500 | -2.78857900 | 0.71655500  |
| F | -5.71775200 | 0.88162200  | -1.53520800 |

|   |             |             |             |
|---|-------------|-------------|-------------|
| F | -3.43371300 | -1.09010500 | 2.09920600  |
| H | -7.53168100 | -0.89639500 | -1.09551300 |
| H | -5.43341000 | -2.70865600 | 2.21352400  |

**Triplet open-shell structure of 2:** Electronic energy = -2108.274834 Hartree

No. of Imaginary Frequency = Zero

Zero-point correction = 0.624578 (Hartree/Particle)

Thermal correction to Energy = 0.665182

Thermal correction to Enthalpy = 0.666126

Thermal correction to Gibbs Free Energy = 0.548768

Sum of electronic and zero-point Energies = -2107.650256

Sum of electronic and thermal Energies = -2107.609652

Sum of electronic and thermal Enthalpies = -2107.608708

Sum of electronic and thermal Free Energies = -2107.726066

| Atom | x           | y           | z           |
|------|-------------|-------------|-------------|
| O    | -1.09362300 | -3.16408200 | -0.68094800 |
| C    | 5.02682200  | 5.81643200  | -0.12633500 |
| H    | 6.11199100  | 5.65757300  | -0.08917700 |
| H    | 4.76132500  | 6.43848400  | 0.73373400  |
| H    | 4.81494300  | 6.38675400  | -1.03589500 |
| C    | 4.28079000  | 4.50298600  | -0.11038000 |
| C    | 3.99353500  | 3.82427000  | -1.29779600 |
| H    | 4.29080600  | 4.26429100  | -2.24738400 |
| C    | 3.33158000  | 2.59211800  | -1.30393400 |
| C    | 2.93708300  | 2.01600500  | -0.07729600 |
| C    | 2.21577100  | 0.70142000  | -0.06566600 |
| C    | 0.78504800  | 0.67580000  | -0.10499800 |
| C    | 0.05708200  | 1.90174500  | -0.11057700 |
| H    | 0.61261000  | 2.83184800  | -0.15400100 |
| C    | -1.31551300 | 1.90365700  | -0.04125600 |
| C    | -2.02325000 | 0.66719100  | 0.06229200  |
| C    | -3.45344600 | 0.95759600  | 0.14302600  |
| C    | -4.52822600 | -0.02434300 | 0.27225400  |
| C    | -5.68201500 | -0.01031200 | -0.53520300 |
| C    | -6.71815200 | -0.92857100 | -0.43338500 |
| C    | -6.60118700 | -1.92464300 | 0.52798700  |
| C    | -2.30014000 | 2.98111300  | -0.03119200 |
| C    | -2.15850800 | 4.36353600  | -0.08488400 |
| H    | -1.17447900 | 4.81734400  | -0.16206400 |
| C    | -3.30303600 | 5.16587900  | -0.03329800 |
| H    | -3.20426900 | 6.24656000  | -0.07530600 |
| C    | -4.58026900 | 4.59012100  | 0.07894300  |
| H    | -5.45413000 | 5.23329000  | 0.12373200  |
| C    | -4.73987600 | 3.21001400  | 0.13399200  |
| H    | -5.73120800 | 2.77962200  | 0.22134300  |
| C    | -3.60019900 | 2.38445100  | 0.07177100  |
| C    | 0.07727300  | -0.57453200 | -0.10277500 |
| C    | 0.83623200  | -1.82438900 | -0.17576600 |
| C    | 2.26313300  | -1.78385900 | -0.04343600 |

|   |             |             |             |
|---|-------------|-------------|-------------|
| C | 3.04564300  | -2.98190000 | -0.00107300 |
| C | 2.37908400  | -4.20497700 | -0.13711100 |
| H | 2.93070600  | -5.13647400 | -0.10565700 |
| C | 1.01190200  | -4.26700100 | -0.35013700 |
| H | 0.54818500  | -5.23498400 | -0.48593200 |
| C | 0.23983800  | -3.10607700 | -0.39656200 |
| C | -1.68423300 | -4.40556500 | -1.07560200 |
| H | -1.64530700 | -5.12096100 | -0.24287700 |
| H | -1.11917000 | -4.83109400 | -1.91522300 |
| C | -3.12064000 | -4.12326100 | -1.47830500 |
| H | -3.15588100 | -3.40483300 | -2.30152500 |
| H | -3.69124100 | -3.71633300 | -0.63910000 |
| H | -3.60266000 | -5.04983400 | -1.80481900 |
| C | 4.49688500  | -2.92975400 | 0.16863200  |
| C | 5.30989700  | -4.07746500 | 0.26786900  |
| H | 4.86630100  | -5.06592800 | 0.23016900  |
| C | 6.68477800  | -3.98223700 | 0.42202900  |
| H | 7.28042600  | -4.88704800 | 0.49737300  |
| C | 7.30955200  | -2.72127400 | 0.48221000  |
| H | 8.38672300  | -2.65229300 | 0.60175100  |
| C | 6.54445100  | -1.57858700 | 0.39095400  |
| H | 7.00864000  | -0.59712000 | 0.43827300  |
| C | 5.13287400  | -1.65212500 | 0.23625600  |
| C | 4.35165200  | -0.48237800 | 0.14789600  |
| H | 4.85309000  | 0.47816600  | 0.18672400  |
| C | 2.94501400  | -0.50283300 | 0.02067400  |
| C | 3.04469400  | 1.89668700  | -2.61522700 |
| H | 1.97152600  | 1.72606400  | -2.75289300 |
| H | 3.52955400  | 0.91558900  | -2.66105300 |
| H | 3.40388200  | 2.49116100  | -3.45949200 |
| C | 3.87967300  | 3.91750000  | 1.09341000  |
| H | 4.08726000  | 4.43119700  | 2.02974400  |
| C | 3.21426000  | 2.68752100  | 1.13295600  |
| C | 2.79943200  | 2.09736000  | 2.46141200  |
| H | 3.08715100  | 2.75360100  | 3.28708200  |
| H | 3.26462700  | 1.11974600  | 2.62787700  |
| H | 1.71595000  | 1.94510000  | 2.51129800  |
| C | -1.34063400 | -0.53622000 | 0.02084400  |
| H | -1.88476100 | -1.46044700 | 0.09794800  |
| C | -4.49679000 | -1.06617300 | 1.21991600  |
| C | -5.49806300 | -2.01671400 | 1.36875400  |
| F | -7.58851800 | -2.82910900 | 0.65068300  |
| F | -5.78769700 | 0.93684100  | -1.48540000 |
| F | -3.44706200 | -1.13874900 | 2.05730800  |
| H | -7.57539700 | -0.87369500 | -1.09208600 |
| H | -5.42752300 | -2.78280900 | 2.13038900  |

**Singlet closed-shell structure of 3:** Electronic energy = -2306.730124 Hartree

No. of Imaginary Frequency = Zero

Zero-point correction = 0.610542 (Hartree/Particle)  
 Thermal correction to Energy = 0.652943  
 Thermal correction to Enthalpy = 0.653887  
 Thermal correction to Gibbs Free Energy = 0.534040  
 Sum of electronic and zero-point Energies = -2306.119582  
 Sum of electronic and thermal Energies = -2306.077181  
 Sum of electronic and thermal Enthalpies = -2306.076237  
 Sum of electronic and thermal Free Energies = -2306.196084

| Atom | x           | y           | z           |
|------|-------------|-------------|-------------|
| O    | -0.91364800 | -3.19296000 | 0.19828400  |
| C    | 5.59848600  | 5.61099100  | 0.20545900  |
| H    | 6.67283700  | 5.39199700  | 0.16289000  |
| H    | 5.41948700  | 6.17240700  | 1.12743200  |
| H    | 5.36697700  | 6.26475500  | -0.64052800 |
| C    | 4.78017200  | 4.34207700  | 0.16300000  |
| C    | 4.32719200  | 3.81785200  | -1.05045500 |
| H    | 4.54823200  | 4.34792700  | -1.97424900 |
| C    | 3.59210700  | 2.62934800  | -1.11622900 |
| C    | 3.29645800  | 1.94028600  | 0.07920400  |
| C    | 2.50930700  | 0.66159400  | 0.03664400  |
| C    | 1.12817700  | 0.67506400  | 0.09990400  |
| C    | 0.44850600  | 1.94985600  | 0.18005600  |
| H    | 1.05631600  | 2.84652400  | 0.22515400  |
| C    | -0.90387000 | 2.02599900  | 0.17220200  |
| C    | -1.69957800 | 0.81027300  | 0.08767100  |
| C    | -3.04722900 | 1.16520600  | 0.04406000  |
| C    | -4.20655600 | 0.26882100  | -0.04432200 |
| C    | -5.21694500 | 0.45737200  | -1.00269900 |
| C    | -6.34439800 | -0.35469800 | -1.07599700 |
| C    | -6.49400300 | -1.41113900 | -0.18148300 |
| C    | -1.82410400 | 3.15914300  | 0.20390900  |
| C    | -1.61302400 | 4.52996500  | 0.30940600  |
| H    | -0.60646000 | 4.93379900  | 0.37835900  |
| C    | -2.72022800 | 5.38435200  | 0.33055200  |
| H    | -2.57338900 | 6.45711800  | 0.41191500  |
| C    | -4.01766700 | 4.86389700  | 0.25182700  |
| H    | -4.86749600 | 5.54013100  | 0.27397900  |
| C    | -4.23936300 | 3.48868000  | 0.14550400  |
| H    | -5.25284700 | 3.10587800  | 0.08860300  |
| C    | -3.13971400 | 2.62601000  | 0.11590100  |
| C    | 0.33803100  | -0.56527000 | 0.05096200  |
| C    | 1.06868900  | -1.85207700 | 0.00536000  |
| C    | 2.50024300  | -1.84455900 | -0.09079100 |
| C    | 3.26021300  | -3.05365400 | -0.17952800 |
| C    | 2.56500400  | -4.27192400 | -0.14623800 |
| H    | 3.09786900  | -5.21226800 | -0.21145400 |
| C    | 1.19458500  | -4.30780800 | -0.02012800 |
| H    | 0.70075200  | -5.26898900 | 0.01127900  |
| C    | 0.43948200  | -3.12741900 | 0.06075800  |
| C    | -1.55167500 | -4.46472800 | 0.37690300  |

|   |             |             |             |
|---|-------------|-------------|-------------|
| H | -1.11515100 | -4.97364900 | 1.24596900  |
| H | -1.38207900 | -5.09234400 | -0.50778300 |
| C | -3.03265000 | -4.21604800 | 0.58404300  |
| H | -3.47225300 | -3.74192500 | -0.29789700 |
| H | -3.20326100 | -3.57160600 | 1.44742700  |
| H | -3.54682300 | -5.16711400 | 0.75197100  |
| C | 4.71196900  | -3.02635500 | -0.29815600 |
| C | 5.50936500  | -4.18866600 | -0.41009100 |
| H | 5.04938200  | -5.16988800 | -0.41341800 |
| C | 6.88635400  | -4.10955100 | -0.52127100 |
| H | 7.46944600  | -5.02171300 | -0.60693500 |
| C | 7.53654300  | -2.85974300 | -0.52485300 |
| H | 8.61745000  | -2.80785700 | -0.61221400 |
| C | 6.78782000  | -1.70761000 | -0.41702000 |
| H | 7.26823400  | -0.73288800 | -0.41781600 |
| C | 5.37555300  | -1.76673900 | -0.30313300 |
| C | 4.60480400  | -0.58325300 | -0.18844900 |
| H | 5.12721800  | 0.36698800  | -0.18112600 |
| C | 3.22440400  | -0.58720100 | -0.08560000 |
| C | 3.11642700  | 2.11183600  | -2.45478400 |
| H | 2.02269200  | 2.09982900  | -2.51431900 |
| H | 3.45500000  | 1.08579400  | -2.63282900 |
| H | 3.49034900  | 2.73742700  | -3.26925200 |
| C | 4.47389200  | 3.64395100  | 1.33441900  |
| H | 4.81031400  | 4.03713500  | 2.29128200  |
| C | 3.74257000  | 2.45189100  | 1.31669200  |
| C | 3.43009300  | 1.74071300  | 2.61372700  |
| H | 3.88756400  | 2.25740500  | 3.46126100  |
| H | 3.79999000  | 0.70995300  | 2.60590400  |
| H | 2.35076400  | 1.68850800  | 2.79303200  |
| C | -1.04305900 | -0.45218000 | 0.03146200  |
| H | -1.64871500 | -1.33819200 | -0.03047800 |
| C | -4.39966800 | -0.80210200 | 0.84224500  |
| C | -5.51439800 | -1.63235300 | 0.78211400  |
| F | -7.56700300 | -2.20619800 | -0.24817800 |
| F | -5.65017100 | -2.64639900 | 1.65037400  |
| F | -7.27461200 | -0.14008100 | -2.01513500 |
| F | -5.10818800 | 1.44412800  | -1.90539100 |
| F | -3.49592800 | -1.05390100 | 1.80400000  |

**Singlet open-shell structure of 3:** Electronic energy = -2306.730124 Hartree

No. of Imaginary Frequency = Zero

Zero-point correction = 0.610542 (Hartree/Particle)

Thermal correction to Energy = 0.652943

Thermal correction to Enthalpy = 0.653887

Thermal correction to Gibbs Free Energy = 0.534040

Sum of electronic and zero-point Energies = -2306.119582

Sum of electronic and thermal Energies = -2306.077181

Sum of electronic and thermal Enthalpies = -2306.076237

Sum of electronic and thermal Free Energies = -2306.196084

| Atom | x           | y           | z           |
|------|-------------|-------------|-------------|
| O    | -0.91364800 | -3.19296000 | 0.19828500  |
| C    | 5.59848600  | 5.61099100  | 0.20545900  |
| H    | 6.67283700  | 5.39199700  | 0.16288900  |
| H    | 5.41948800  | 6.17240600  | 1.12743300  |
| H    | 5.36697600  | 6.26475500  | -0.64052700 |
| C    | 4.78017200  | 4.34207700  | 0.16300000  |
| C    | 4.32719200  | 3.81785200  | -1.05045500 |
| H    | 4.54823200  | 4.34792700  | -1.97424900 |
| C    | 3.59210700  | 2.62934800  | -1.11622900 |
| C    | 3.29645800  | 1.94028600  | 0.07920400  |
| C    | 2.50930700  | 0.66159400  | 0.03664400  |
| C    | 1.12817700  | 0.67506400  | 0.09990400  |
| C    | 0.44850600  | 1.94985600  | 0.18005600  |
| H    | 1.05631600  | 2.84652400  | 0.22515400  |
| C    | -0.90387000 | 2.02599900  | 0.17220200  |
| C    | -1.69957800 | 0.81027300  | 0.08767100  |
| C    | -3.04722900 | 1.16520600  | 0.04406000  |
| C    | -4.20655600 | 0.26882100  | -0.04432200 |
| C    | -5.21694500 | 0.45737200  | -1.00269900 |
| C    | -6.34439800 | -0.35469800 | -1.07599700 |
| C    | -6.49400300 | -1.41113900 | -0.18148400 |
| C    | -1.82410400 | 3.15914300  | 0.20390900  |
| C    | -1.61302400 | 4.52996500  | 0.30940600  |
| H    | -0.60646000 | 4.93379900  | 0.37836000  |
| C    | -2.72022800 | 5.38435200  | 0.33055200  |
| H    | -2.57338900 | 6.45711800  | 0.41191500  |
| C    | -4.01766700 | 4.86389700  | 0.25182700  |
| H    | -4.86749600 | 5.54013000  | 0.27397900  |
| C    | -4.23936300 | 3.48868000  | 0.14550400  |
| H    | -5.25284700 | 3.10587800  | 0.08860300  |
| C    | -3.13971400 | 2.62601000  | 0.11590100  |
| C    | 0.33803100  | -0.56527000 | 0.05096200  |
| C    | 1.06868900  | -1.85207700 | 0.00536000  |
| C    | 2.50024300  | -1.84455900 | -0.09079100 |
| C    | 3.26021300  | -3.05365400 | -0.17952800 |
| C    | 2.56500400  | -4.27192400 | -0.14623800 |
| H    | 3.09786900  | -5.21226800 | -0.21145400 |
| C    | 1.19458500  | -4.30780800 | -0.02012700 |
| H    | 0.70075200  | -5.26898900 | 0.01127900  |
| C    | 0.43948200  | -3.12741900 | 0.06075800  |
| C    | -1.55167500 | -4.46472800 | 0.37690300  |
| H    | -1.11515100 | -4.97364900 | 1.24596900  |
| H    | -1.38207900 | -5.09234400 | -0.50778300 |
| C    | -3.03265000 | -4.21604800 | 0.58404400  |
| H    | -3.47225300 | -3.74192500 | -0.29789700 |
| H    | -3.20326100 | -3.57160600 | 1.44742800  |
| H    | -3.54682300 | -5.16711400 | 0.75197100  |

|   |             |             |             |
|---|-------------|-------------|-------------|
| C | 4.71196900  | -3.02635500 | -0.29815600 |
| C | 5.50936500  | -4.18866600 | -0.41009100 |
| H | 5.04938200  | -5.16988800 | -0.41341800 |
| C | 6.88635400  | -4.10955100 | -0.52127100 |
| H | 7.46944600  | -5.02171300 | -0.60693500 |
| C | 7.53654300  | -2.85974300 | -0.52485300 |
| H | 8.61745000  | -2.80785700 | -0.61221400 |
| C | 6.78782000  | -1.70761000 | -0.41702100 |
| H | 7.26823400  | -0.73288800 | -0.41781600 |
| C | 5.37555300  | -1.76673900 | -0.30313300 |
| C | 4.60480400  | -0.58325300 | -0.18844900 |
| H | 5.12721800  | 0.36698800  | -0.18112600 |
| C | 3.22440400  | -0.58720100 | -0.08560000 |
| C | 3.11642700  | 2.11183600  | -2.45478400 |
| H | 2.02269200  | 2.09982900  | -2.51431900 |
| H | 3.45500000  | 1.08579400  | -2.63282900 |
| H | 3.49034900  | 2.73742700  | -3.26925200 |
| C | 4.47389200  | 3.64395100  | 1.33441900  |
| H | 4.81031400  | 4.03713500  | 2.29128200  |
| C | 3.74257000  | 2.45189100  | 1.31669200  |
| C | 3.43009300  | 1.74071300  | 2.61372700  |
| H | 3.88756400  | 2.25740500  | 3.46126100  |
| H | 3.79999000  | 0.70995300  | 2.60590400  |
| H | 2.35076400  | 1.68850800  | 2.79303300  |
| C | -1.04305900 | -0.45218000 | 0.03146300  |
| H | -1.64871500 | -1.33819200 | -0.03047800 |
| C | -4.39966900 | -0.80210200 | 0.84224500  |
| C | -5.51439800 | -1.63235300 | 0.78211400  |
| F | -7.56700300 | -2.20619800 | -0.24817800 |
| F | -5.65017100 | -2.64639900 | 1.65037400  |
| F | -7.27461200 | -0.14008100 | -2.01513500 |
| F | -5.10818700 | 1.44412800  | -1.90539100 |
| F | -3.49592800 | -1.05390100 | 1.80400000  |

**Triplet open-shell structure of 3:** Electronic energy = -2306.707754 Hartree

No. of Imaginary Frequency = Zero

Zero-point correction = 0.608421 (Hartree/Particle)

Thermal correction to Energy = 0.650973

Thermal correction to Enthalpy = 0.651917

Thermal correction to Gibbs Free Energy = 0.530623

Sum of electronic and zero-point Energies = -2306.099333

Sum of electronic and thermal Energies = -2306.056781

Sum of electronic and thermal Enthalpies = -2306.055836

Sum of electronic and thermal Free Energies = -2306.177131

| Atom | x           | y           | z          |
|------|-------------|-------------|------------|
| O    | -0.91039500 | -3.17532600 | 0.15336900 |
| C    | 5.53567000  | 5.67221300  | 0.22772700 |

|   |             |             |             |
|---|-------------|-------------|-------------|
| H | 6.61537500  | 5.48051700  | 0.18733400  |
| H | 5.34025500  | 6.22586000  | 1.15114000  |
| H | 5.29095600  | 6.32349700  | -0.61670200 |
| C | 4.74909200  | 4.38347900  | 0.17795700  |
| C | 4.33701700  | 3.83865900  | -1.04121200 |
| H | 4.56666800  | 4.36660700  | -1.96433500 |
| C | 3.63351000  | 2.63157900  | -1.11242600 |
| C | 3.32624300  | 1.94273900  | 0.08062500  |
| C | 2.56122300  | 0.65346500  | 0.03180500  |
| C | 1.13202200  | 0.67371200  | 0.07879500  |
| C | 0.46276800  | 1.93071300  | 0.13956200  |
| H | 1.06254000  | 2.83323600  | 0.16362400  |
| C | -0.90737300 | 2.00007200  | 0.14529600  |
| C | -1.67893500 | 0.79943100  | 0.09020000  |
| C | -3.09268200 | 1.17257100  | 0.04902800  |
| C | -4.24298800 | 0.27341900  | -0.02248100 |
| C | -5.27843000 | 0.46227700  | -0.95718700 |
| C | -6.39670400 | -0.36269400 | -1.01491200 |
| C | -6.51526000 | -1.43016200 | -0.12837100 |
| C | -1.82946800 | 3.13037500  | 0.16199300  |
| C | -1.61223800 | 4.50145500  | 0.24289900  |
| H | -0.60366700 | 4.90096400  | 0.29878500  |
| C | -2.71432900 | 5.36267800  | 0.25797800  |
| H | -2.55729100 | 6.43531700  | 0.32129200  |
| C | -4.02424800 | 4.85643300  | 0.19937200  |
| H | -4.86432400 | 5.54409500  | 0.21953100  |
| C | -4.25841000 | 3.48850900  | 0.11769200  |
| H | -5.27469800 | 3.11229500  | 0.07741900  |
| C | -3.16068000 | 2.60618900  | 0.08964900  |
| C | 0.37185900  | -0.54693100 | 0.04047400  |
| C | 1.08592300  | -1.82902200 | -0.01287700 |
| C | 2.52185200  | -1.82692000 | -0.09695600 |
| C | 3.27517400  | -3.04165000 | -0.19142800 |
| C | 2.57245400  | -4.25027200 | -0.18702700 |
| H | 3.09959800  | -5.19322400 | -0.26069100 |
| C | 1.19451500  | -4.28521900 | -0.07704700 |
| H | 0.70138800  | -5.24707600 | -0.06632900 |
| C | 0.44580400  | -3.11152700 | 0.01883300  |
| C | -1.54783600 | -4.45122000 | 0.28898700  |
| H | -1.11552000 | -4.98710800 | 1.14392800  |
| H | -1.37291400 | -5.05161800 | -0.61352600 |
| C | -3.03024100 | -4.21152300 | 0.49697900  |
| H | -3.46623600 | -3.70726600 | -0.37013200 |
| H | -3.20579100 | -3.59910500 | 1.38253800  |
| H | -3.54432700 | -5.16832100 | 0.62875800  |
| C | 4.73450000  | -3.02923600 | -0.28696300 |
| C | 5.51709200  | -4.19716100 | -0.39695000 |
| H | 5.04497400  | -5.17267300 | -0.41758200 |
| C | 6.89991000  | -4.13887700 | -0.48348000 |
| H | 7.47120100  | -5.05844000 | -0.56792400 |
| C | 7.56455700  | -2.89707300 | -0.46261800 |

|   |             |             |             |
|---|-------------|-------------|-------------|
| H | 8.64766300  | -2.85776100 | -0.53036700 |
| C | 6.83051100  | -1.73573000 | -0.35626100 |
| H | 7.32482500  | -0.76812100 | -0.33891800 |
| C | 5.41181100  | -1.77238200 | -0.26706600 |
| C | 4.66036300  | -0.58665200 | -0.15840400 |
| H | 5.18830400  | 0.35996300  | -0.13938400 |
| C | 3.24959900  | -0.57035000 | -0.07577100 |
| C | 3.21012200  | 2.08365100  | -2.45619800 |
| H | 2.12313500  | 1.96249000  | -2.51579800 |
| H | 3.64941200  | 1.09756200  | -2.64201900 |
| H | 3.52082100  | 2.74990200  | -3.26528000 |
| C | 4.43343600  | 3.68711700  | 1.34783600  |
| H | 4.73925500  | 4.09549100  | 2.30876000  |
| C | 3.73167800  | 2.47733600  | 1.32239700  |
| C | 3.41425000  | 1.76203400  | 2.61577500  |
| H | 3.79564800  | 2.32036800  | 3.47477800  |
| H | 3.85853400  | 0.76112600  | 2.63790300  |
| H | 2.33474400  | 1.63208800  | 2.74839800  |
| C | -1.05185600 | -0.43559700 | 0.03377400  |
| H | -1.64568800 | -1.32988800 | -0.02151400 |
| C | -4.40349300 | -0.81385100 | 0.85416100  |
| C | -5.51204000 | -1.65191600 | 0.81153700  |
| F | -7.58164300 | -2.23306600 | -0.17783800 |
| F | -5.62170400 | -2.67210300 | 1.67431900  |
| F | -7.34829200 | -0.14960200 | -1.93144800 |
| F | -5.20032200 | 1.45538400  | -1.85530900 |
| F | -3.47872300 | -1.06095100 | 1.79529700  |

#### 4. Appendix:

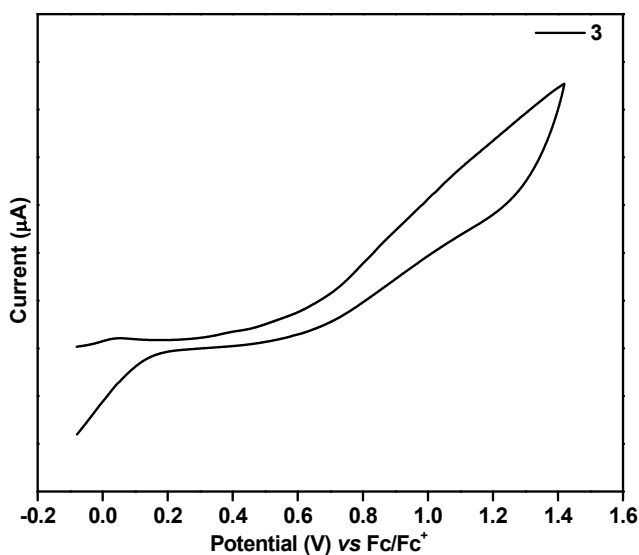

**Fig. S21:** Anodic scan of **3**, revealing no well-resolved oxidation in the CV experiment.

We have not calculated the HOMO energy of **3**, as the oxidation peak cannot be clearly defined from the CV scan. Thus, the electrochemical HOMO-LUMO gap is not calculated.

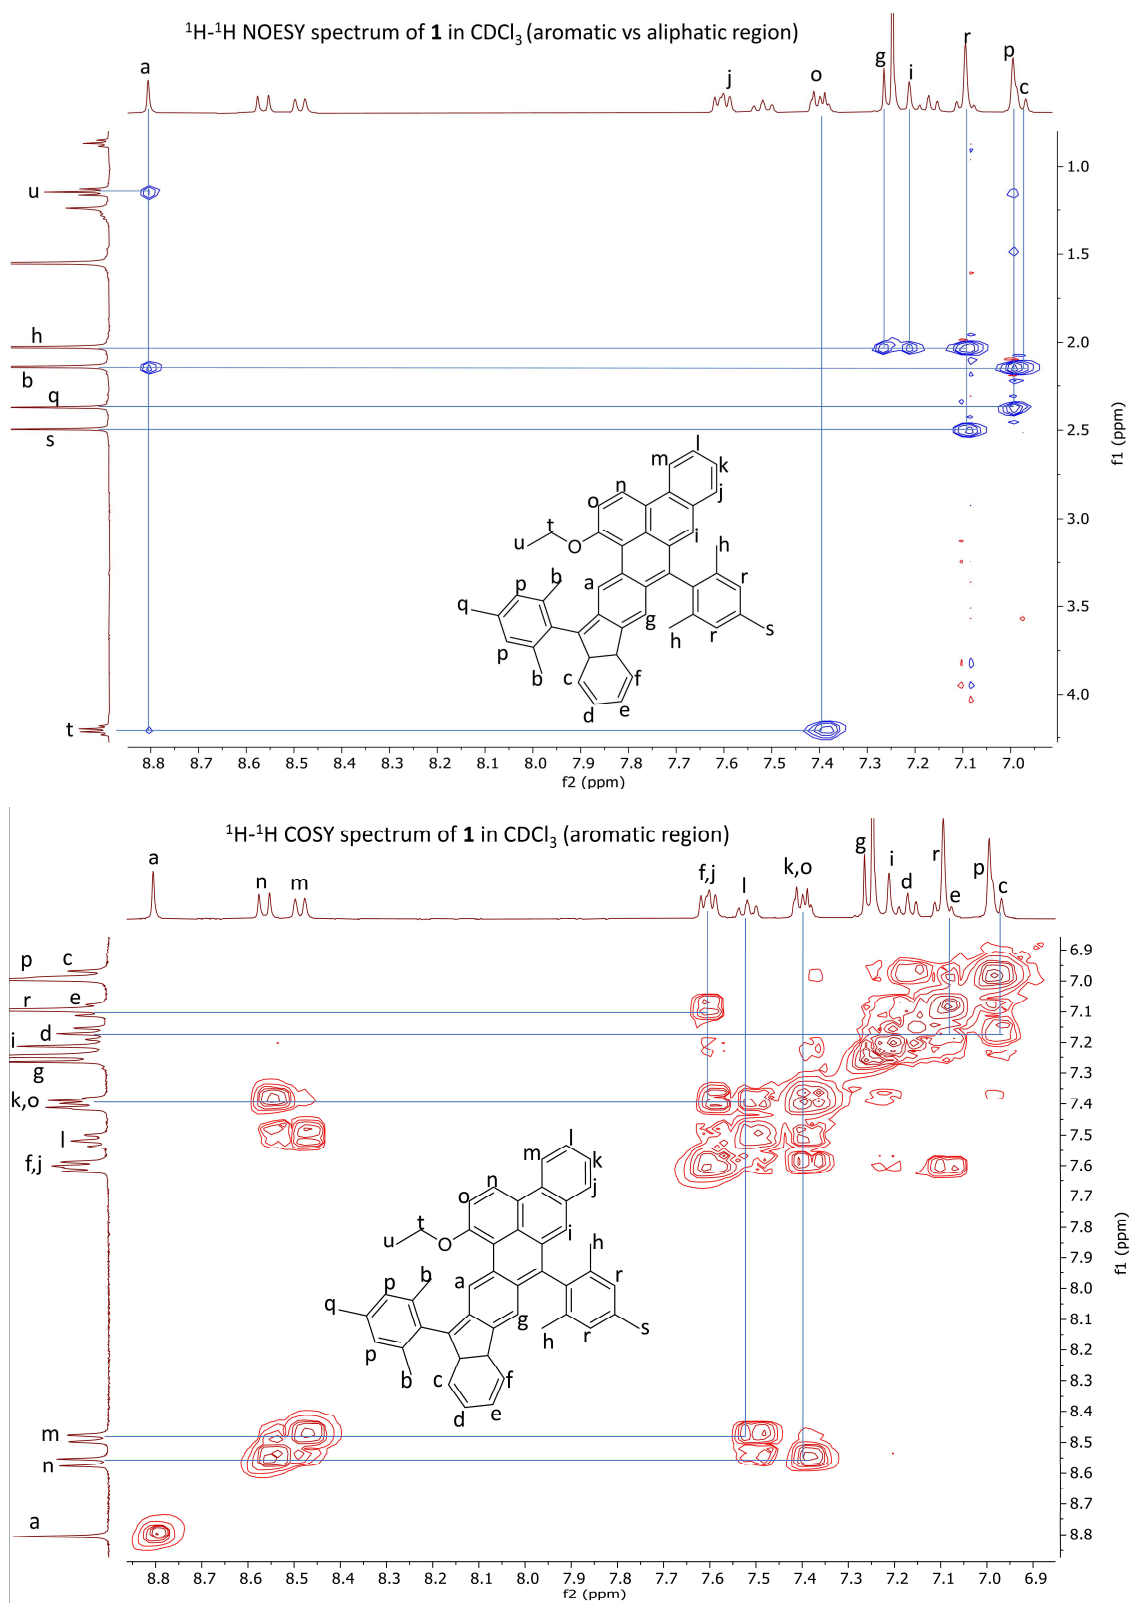

**Fig. S22.** 2D gNOESY (top) and 2D gCOSY (bottom) spectra of **1** in CDCl<sub>3</sub> at 298 K.

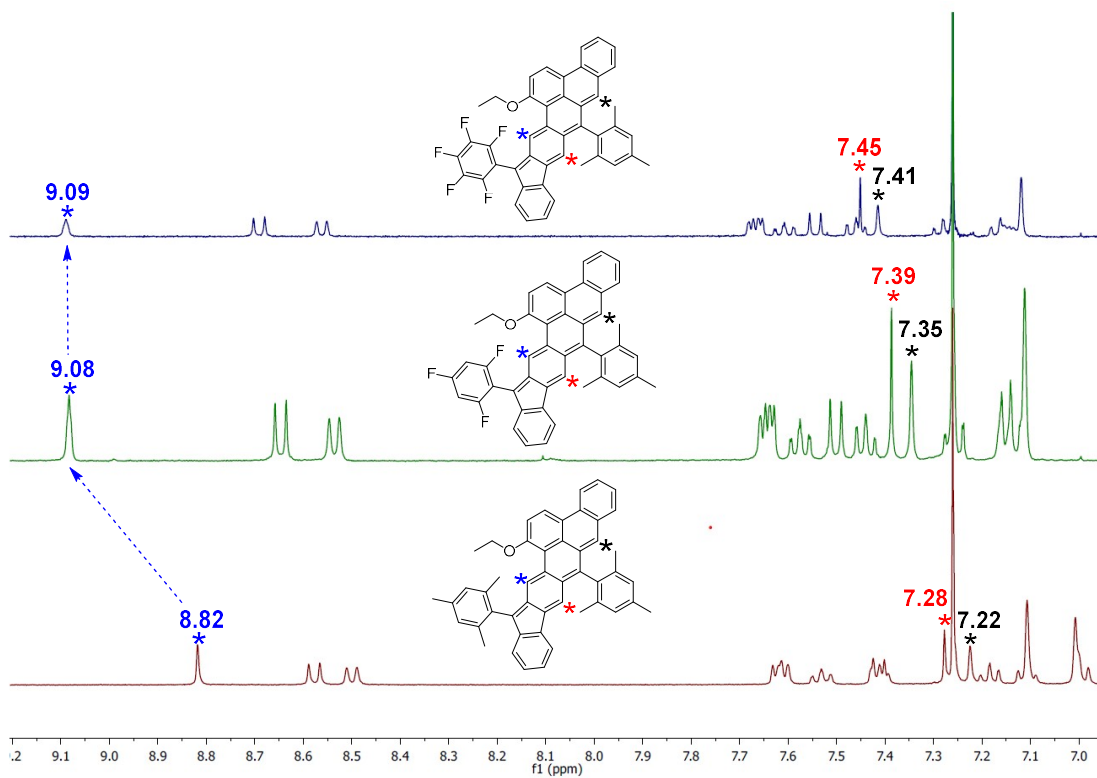

**Fig. S23** Partial  $^1\text{H}$  NMR spectra of compounds **1**, **2** and **3** showing a downfield chemical shift of core protons for the starred (\*) singlets as core aromaticity is enhanced from **1** to **3**.

(a) LUMO:

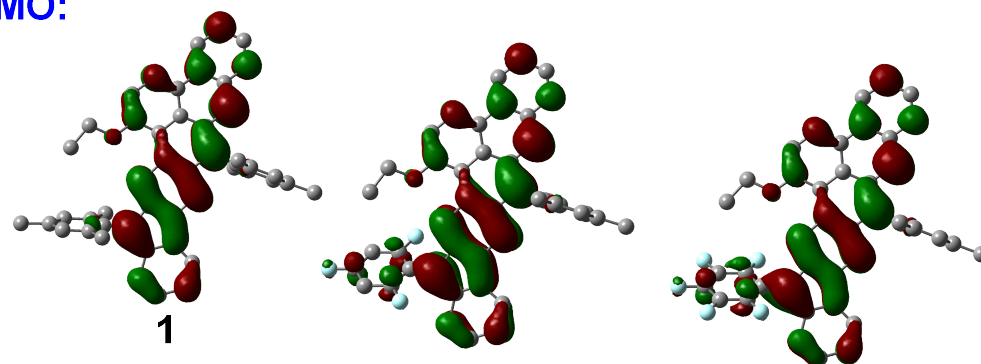

1  
-2.40 eV  
L

2  
-2.55 eV  
L

3  
-2.68 eV  
L

2.01 eV

1.95 eV

1.95 eV

(b) HOMO:

H  
-4.41 eV

H  
-4.50 eV

H  
-4.63 eV

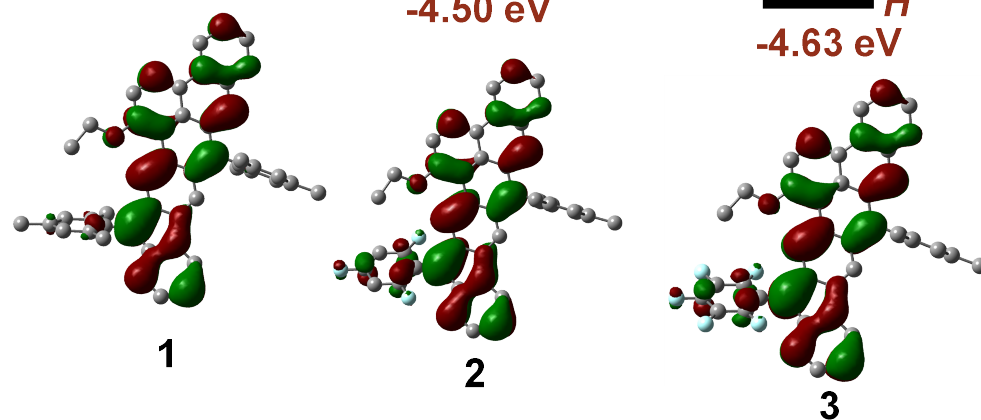

1

2

3

Fig. S24 Frontier molecular orbital profiles of 1, 2, and 3.

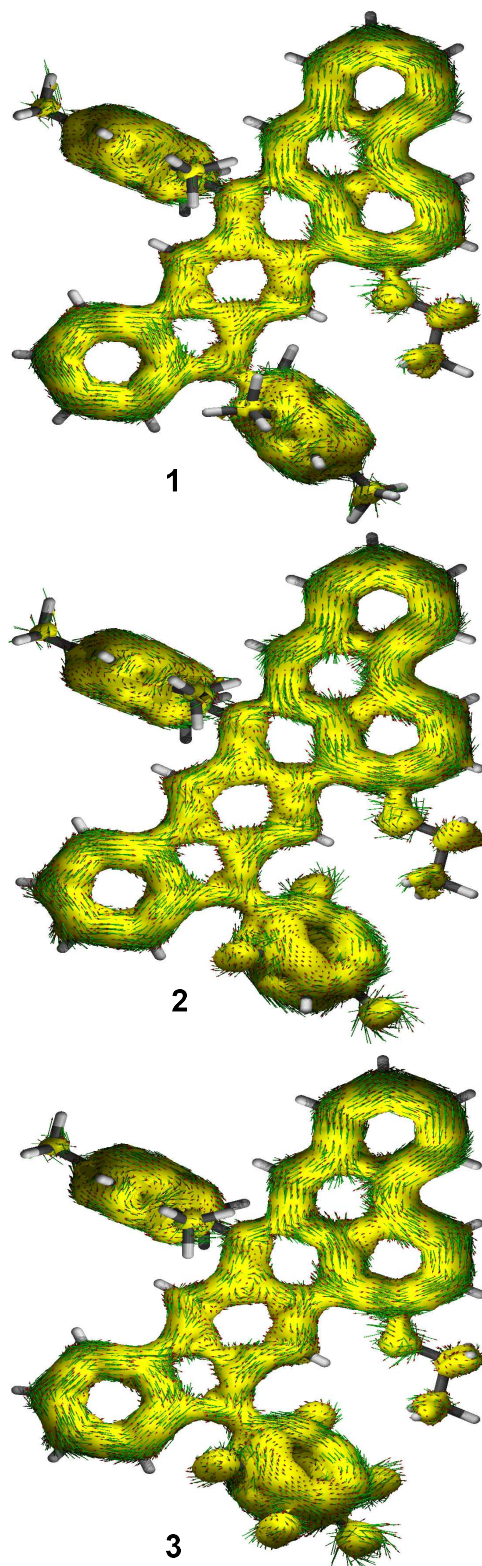

**Fig. S25** Current-density vectors for 1-3 plotted onto the ACID isosurface of 0.02.

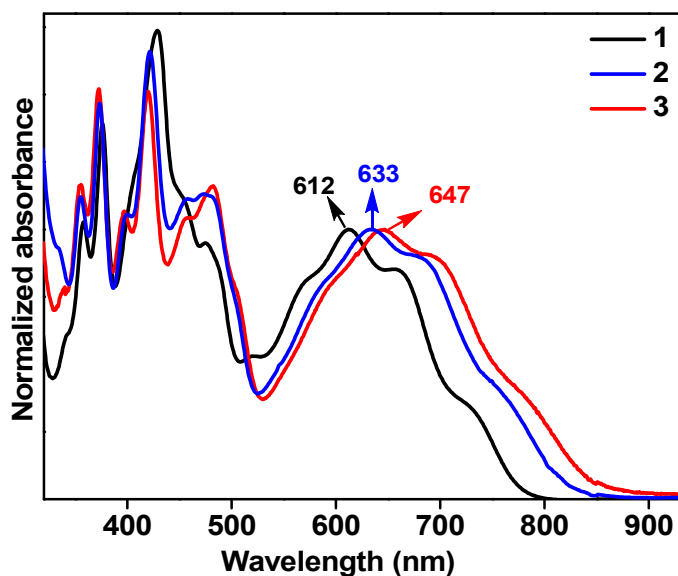

Fig. S26 Normalized absorbance plots for 1-3.

## 5. References:

1. P. K. Sharma, A. Babbar, D. Mallick and S. Das, *J. Org. Chem.* 2023, **88**, 5473–5482.
2. Bruker, SAINT V8.38A, (Bruker AXS Inc., 2017).
3. O. V. Dolomanov, L. J. Bourhis, R. J. Gildea, J. A. Howard, H. Puschmann, *J. Appl. Crystallogr.* 2009, **42**, 339–341.
4. L. J. Bourhis, O. V. Dolomanov, R. J. Gildea, J. A. Howard, H. Puschmann, *Acta Crystallogr. A*. 2015, **71**, 59–75.
5. G. M. Sheldrick, *Acta Crystallogr. C Struct. Chem.* 2015, **71**, 3–8.
6. M. J. Frisch, G. W. Trucks, H. B. Schlegel, G. E. Scuseria, M. A. Robb, J. R. Cheeseman, G. Scalmani, V. Barone, B. Mennucci, G. A. Petersson, H. Nakatsuji, M. Caricato, X. Li, H. P. Hratchian, A. F. Izmaylov, J. Bloino, G. Zheng, J. L. Sonnenberg, M. Hada, M. Ehara, K. Toyota, R. Fukuda, J. Hasegawa, M. Ishida, T. Nakajima, Y. Honda, O. Kitao, H. Nakai, T. Vreven, J. A. Montgomery, J. E. Jr., Peralta, F. Ogliaro, M. Bearpark, J. J. Heyd, E. Brothers, K. N. Kudin, V. N. Staroverov, T. Keith, R. Kobayashi, J. Normand, K. Raghavachari, A. Rendell, J. C. Burant, S. S. Iyengar, J. Tomasi, M. Cossi, N. Rega, J. M. Millam, M. Klene, J. E. Knox, J. B. Cross, V. Bakken, C. Adamo, J. Jaramillo, R. Gomperts, R. E. Stratmann, O. Yazyev, A. J. Austin, R. Cammi, C. Pomelli, J. W. Ochterski, R. L. Martin, K. Morokuma, V. G. Zakrzewski, G. A. Voth, P. Salvador, J. J. Dannenberg, S. Dapprich, A. D. Daniels, O.

Farkas, J. B. Foresman, J. V. Ortiz, J. Cioslowski, D. J. Fox, Gaussian 09 (Revision B.01), Gaussian Inc., Wallingford CT, 2010.

7 (a) T. Kubo, *Chem. Lett.* 2015, **44**, 111–122. (b) S. Das, J. Wu, In *Polycyclic arenes and heteroarenes: synthesis, properties, and applications*, 1st ed.; M. Qian, Ed.; Wiley-VCH Verlag GmbH & Co., 2016; Chapter 1, p 3, “*Open-shell benzenoid polycyclic hydrocarbons*”.

8. Z. Chen, C. S. Wannere, C. Corminboeuf, R. Puchta, P. v. R. Schleyer, *Chem. Rev.* 2005, **105**, 3842–3888.

9. R. R. Valiev, H. Fliegl, D. Sundholm, *Phys. Chem. Chem. Phys.* 2018, **20**, 17705.

10. N. M. O’boyle, A. L. Tenderholt, K. M. Langner, *J. Comput. Chem.* 2008, **29**, 839–845.

11. R. Herges, D. Geuenich, *J. Phys. Chem. A* 2001, **105**, 3214.
